# Supplementary material for: Chemical Abrasion: The Mechanics of Zircon Dissolution
Source: Copernicus journal article supplement (doi:10.5194/gchron-2022-19), 2022-07-26
Supplement: Supplementary file 2 [file Table_S1.xlsx]

## Sheet: AS3
Table S1. Raman data for zircon sample AS3.
Zircon	Analysis Positiona	Eg Raman Shift (cm-1)b	Eg FWHM (cm-1)c	v3(SiO4) Raman Shift (cm-1)b	v3(SiO4) FWHM (cm-1)c	alpha dose (α/g)d	2σ (α/g)e
Unannealed
u01	1	355.072	7.96396	1005.24	7.42444	3.49372e+17	5.13e+16
u01	2	353.728	10.5527	1003.88	11.6264	6.60619e+17	9.37e+16
u01	3	354.094	16.3838	1004.82	14.4057	8.99013e+17	1.313e+17
u03	3	349.106	17.9132	993.602	19.211	1.39957e+18	2.301e+17
u04	1	354.217	10.1782	1004.39	9.34991	4.85635e+17	6.86e+16
u04	2	353.294	21.0378	1005.02	16.5242	1.10348e+18	1.669e+17
u04	3	353.754	12.237	1004.62	11.2358	6.29416e+17	8.86e+16
u05	1	348.578	24.1088	998.437	14.5583	9.13022e+17	1.351e+17
u05	2	349.028	29.3258	999.22	17.1621	1.16967e+18	1.803e+17
u05	3	348.656	30.2046	997.564	17.7331	1.23096e+18	1.956e+17
u06	1	350.624	19.2495	1000.3	13.0935	7.82683e+17	1.122e+17
u06	2	351.734	18.0657	1000.39	11.5356	6.53322e+17	9.27e+16
u06	3	346.776	48.0597	997.798	29.5538	3.4094e+18	1.1316e+18
u06	4	345.863	26.9544	996.931	19.8883	1.48219e+18	2.5e+17
u07	1	353.227	14.3257	1004.33	12.6666	7.46338e+17	1.061e+17
u07	3	353.864	22.8982	1004.87	16.9545	1.14787e+18	1.783e+17
u08	1	349.78	19.3914	1000.69	12.9299	7.68675e+17	1.101e+17
u08	2	346.578	27.061	997.262	20.7323	1.59051e+18	2.779e+17
u08	3	344.137	32.2425	996.828	23.4903	1.99555e+18	3.898e+17
u09	3	347.796	27.7215	997.775	17.4805	1.2036e+18	1.879e+17
u11	1	348.191	27.37	997.236	19.4672	1.43039e+18	2.371e+17
u11	2	348.62	28.6542	997.688	17.3118	1.18555e+18	1.827e+17
u11	3	349.549	23.7824	999.412	14.3691	8.95667e+17	1.307e+17
u13	1	345.58	48.0327	995.63	35.9267	>~1E+19	–
u13	3	347.298	35.9021	996.436	21.7799	1.73427e+18	3.1272e+17
u14	3	353.484	12.8977	1004.95	10.4131	5.65332e+17	7.973e+16
u14	4	353.932	11.9488	1004.47	10.6208	5.8131e+17	8.133e+16
u15	2	354.472	9.33501	1005.2	9.08304	4.66149e+17	6.527e+16
u15	3	353.705	18.8741	1005.42	16.2119	1.0719e+18	1.6205e+17
u16	1	354.562	9.05461	1004.19	8.40395	4.17456e+17	5.944e+16
u16	2	355.808	7.03806	1005.73	5.67393	2.3352e+17	3.622e+16
u16	3	353.184	15.7125	1004.34	13.1315	7.85954e+17	1.1304e+17
Annealed
SL01	D	353.267	8.67458	1003.48	6.67529
SL01	L	347.298	22.1246	992.764	16.7251
SL02	L	343.992	19.3629	986.06	14.9991
SL05	D	355.525	6.79377	1006.17	6.15078
SL05	L	356.278	5.10245	1008.06	3.59819
SL06	D	354.849	11.725	1006.45	9.91955
SL06	L	352.403	10.7364	1000.66	9.77735
SL07	D	356.084	5.60944	1006.96	4.20219
SL07	L	356.312	6.15676	1007.36	4.93578
SL08	D	354.056	19.3943	1006.01	19.0295
SL08	L	355.8	6.8326	1006.53	5.4097
SL09	D	349.947	12.8192	995.655	10.5074
SL09	L	356.382	6.4339	1007.49	4.94378
SL10	D	355.149	8.74215	1006.01	6.15738
SL10	L	353.381	18.9048	1005.18	16.6713
SL11	D	355.022	14.8522	1004.75	12.8619
SL11	L	355.815	7.84973	1006.52	6.6537
SL13	D	353.07	12.5149	1004.52	11.7132
SL13	L	355.917	7.14968	1006.93	5.15789
SL14	L	355.089	8.09086	1005.86	8.55625
SL15	D	354.741	9.7925	1005.23	8.35363
SL15	L	355.435	10.7127	1007.02	9.89775
SL16	L	355.712	8.68336	1005.09	7.58522
SL17	L	353.618	7.71198	1002.68	5.48601
SL18	D	353.013	17.5102	1005.16	15.0124
SL18	L	353.552	11.5401	1004.73	10.7644
SL20	D	354.383	9.68148	1005.72	9.06394
SL20	L	354.983	6.05599	1006.24	4.68714
SL21	D	354.821	6.48874	1006.04	4.70619
SL21	L	354.259	7.37542	1004.73	6.28162
SL22	D	354.324	7.17177	1004.93	6.58479
SL22	L	354.808	5.53001	1005.89	4.09953
SL23	D	352.606	11.469	1002.69	11.0552
SL23	L	352.266	8.96216	1000.33	7.59991
SL24	D	353.929	9.18253	1005.07	9.13684
SL25	D	352.302	14.37	1003.48	13.8544
SL25	L	354.698	5.93373	1005.57	4.79562
SL26	D	352.398	19.3374	1004.53	15.8781
SL26	L	351.954	10.2822	1001	8.85733
SL27	L	354.54	6.15558	1004.58	4.31925
SL28	D	353.189	15.4973	1005.38	13.9299
SL28	L	355.145	5.84402	1006.52	4.5876
SL29	D	352.924	14.5606	1003.89	13.2188
SL29	L	353.066	7.12699	1003	4.71479
SL30	D	350.366	21.9987	999.072	20.0078
SL30	L	354.02	9.24299	1004.67	9.04628
SL31	D	353.176	14.7481	1004.28	15.0054
SL31	L	354.747	8.35154	1006.22	7.14277
SL32	L	353.292	10.6561	1004.12	10.2356
SL33	D	353.016	19.73	1003.64	17.07
SL33	L	353.293	10.6392	1004.12	10.2319
SL34	D	352.43	19.7316	1005.2	16.9765
SL34	L	355.102	5.43023	1006.83	4.37796
SL35	D	353.396	11.539	1003.99	9.12856
SL35	L	353.828	13.3977	1004.57	10.126
SL36	D	353.666	11.3747	1005	9.47867
SL36	L	355.406	15.3793	1006.08	11.177
SL37	D	351.743	11.5842	1000.98	11.3787
SL37	L	353.267	8.67458	1003.48	6.67529
Chemically Abraded
180 °C, 4 hr
Zr13a		354.161	12.592	1005.14	11
Zr13b		356.011	6.73168	1006.8	5.64139
Zr14a		354.995	9.33653	1006.04	9.06947
Zr14b		353.569	13.5607	1004.96	10.1997
Zr16		355.511	7.10586	1006.06	6.93397
Zr10a		355.343	7.45964	1005.51	7.02921
Zr11a		355.49	7.7082	1005.84	7.46873
Zr11b		355.144	8.23047	1005.31	6.75515
Zr12a		355.16	8.80028	1005.57	8.05557
Zr15a		354.366	9.49732	1005.08	9.50596
Zr15b		355.084	7.82358	1005.25	7.15744
Zr16b		355.94	6.35694	1006.56	4.99954
Zr17a		355.177	8.05167	1005.81	7.76816
Zr17b		355.149	8.12766	1005.76	8.30054
Zr17c		355.415	7.73012	1006.15	7.32549
180 °C, 12 hr
p5		353.463	11.0088	1004.3	10.9558
p7		354.381	8.8258	1004.5	8.05158
p8		356.214	5.53342	1006.92	4.0008
p9		355.789	6.40173	1006.48	5.81357
p10		355.446	7.21659	1005.93	8.03761
210 °C, 4 hr
Zr02a		355.548	6.65641	1005.97	5.21803
Zr02b		355.123	7.99211	1005.54	5.65176
Zr03a		355.157	7.67545	1005.77	7.65326
Zr03b		354.215	10.6161	1004.88	8.96245
Zr03c		355.099	8.03412	1005.37	7.82708
Zr03d		355.549	7.4571	1005.71	6.76809
Zr04a		354.506	9.37306	1005.64	9.22437
Zr04b		355.422	7.12581	1005.95	5.57669
Zr04c		353.159	14.6476	1004.9	13.6042
Zr04d		355.365	7.33262	1006.29	7.19632
Zr07a		353.852	14.9709	1004.22	14.0373
Zr08a		353.326	15.75	1004.77	12.5452
Zr08b		354.924	9.87185	1004.47	10.4137
Zr09a		354.17	14.5224	1004.89	12.8501
aL = CL light zone, D = CL dark zone
bRaman shifts for chemically abraded zircon samples are empirically corrected for downshifts caused by laser-induced heating of carbon coated samples. Estimated errors are ±1.0 cm-1.
cReported values are corrected for instrumental band broadening following the approach of Váczi et al. (2014) for a bandpass value of 1.5. Estimated 2σ uncertainties are 10%.
dAlpha dose values are calculated from v3(SiO4) FWHM values using the calibration presented by Váczi and Nasdala (2017) based on the work of Palenik et al. (2003).
eReported uncertainties reflect propagated v3(SiO4) FWHM analytical uncertainties.

## Sheet: SAM-47
Table S1 Cont'd. Raman data for zircon sample SAM-47.
Zircon	Analysis Positiona	Eg Raman Shift (cm-1)b	Eg FWHM (cm-1)c	v3(SiO4) Raman Shift (cm-1)b	v3(SiO4) FWHM (cm-1)c	alpha dose (α/g)d	2σ (α/g)e
Unannealed
u01	R	345.019	24.5556	995.85	18.6228	1.33064e+18	2.144e+17
u01	C	344.869	24.524	994.731	19.1497	1.39226e+18	2.2678e+17
u02	R	340.323	37.0566	991.956	24.0881	2.09616e+18	4.1711e+17
u02	C	344.243	29.0937	994.704	17.8316	1.24174e+18	1.9722e+17
u03	R	350.868	14.0338	1000.55	10.4091	5.65027e+17	7.975e+16
u03	C	348.854	16.5224	999.166	11.9137	6.83907e+17	9.738e+16
u04	R	344.124	29.2521	994.928	22.742	1.87675e+18	3.5251e+17
u04	C	346.301	24.8744	996.32	18.5661	1.32412e+18	2.1405e+17
u05	R	345.649	25.5944	996.172	17.605	1.21704e+18	1.9229e+17
u05	C	345.527	24.3424	996.458	14.4819	9.05991e+17	1.3382e+17
u06	R	346.318	26.9788	996.385	17.9921	1.25943e+18	2.012e+17
u06	C	347.211	23.7359	995.47	16.1505	1.06576e+18	1.6029e+17
u07	R	345.441	26.6709	993.056	21.4241	1.68421e+18	3.004e+17
u07	C	348.14	20.677	997.112	15.3688	9.89219e+17	1.4747e+17
u08	R	345.832	23.636	994.188	17.7477	1.23256e+18	1.9279e+17
u08	C	348.571	18.4756	997.625	14.796	9.35052e+17	1.3624e+17
u09	R	345.663	22.8864	995.454	16.2022	1.07093e+18	1.6146e+17
u09	C	348.922	18.7071	997.997	13.6985	8.35424e+17	1.2103e+17
u10	R	346.656	25.8711	995.869	18.2445	1.28761e+18	2.0359e+17
u10	C	349.634	17.3039	1000.08	12.4248	7.26063e+17	1.0427e+17
u11	R	346.106	22.653	996.104	18.3016	1.29404e+18	2.0784e+17
u11	C	347.394	20.4554	997.697	17.3757	1.19237e+18	1.8442e+17
u12	R	345.651	24.6714	995.759	19.1623	1.39376e+18	2.3117e+17
u12	C	349.34	20.2356	992.442	14.8474	9.39845e+17	1.3858e+17
u13	R	345.172	26.1401	994.763	21.1945	1.65259e+18	2.8867e+17
u13	C	348.346	20.9904	998.538	13.8895	8.52391e+17	1.2481e+17
Annealed
a02	R	354.005	11.2818	1004.87	11.4268
a02	C	354.349	8.37925	1004.98	8.61006
a03	R	354.153	8.60756	1004.43	8.43488
a03	C	354.351	8.82032	1005.64	9.02779
a05	R	353.957	12.4225	1004.39	11.2076
a05	C	353.983	7.74656	1004.81	7.89231
a06	R	353.918	8.91129	1004.13	9.02175
a06	C	353.594	8.09425	1003.82	8.13011
a08	R	351.816	13.4419	1002.41	14.5506
a08	C	353.436	8.3297	1003.49	7.68904
a09	C	353.401	8.82002	1003.79	9.92702
a10	R	353.433	8.99962	1003.6	8.35214
a11	C	354.246	8.0286	1004.58	7.84632
a12	R	352.933	8.81492	1003.43	8.60374
a13	C	354.023	8.49416	1004.31	8.25634
a14	R	353.984	9.68882	1003.96	9.97654
a15	C	353.29	9.08459	1003.45	9.99036
a16	R	353.968	10.2029	1004.9	10.7863
a17	C	353.441	8.55183	1003.8	8.79885
a18	R	353.683	8.73295	1003.8	8.96704
a19	C	354.234	7.09479	1005.21	6.92968
a20	R	354.297	12.8824	1005.61	12.5657
a21	C	353.253	10.4077	1004.05	10.6183
a22	R	352.772	10.8617	1002.76	10.0176
a23	C	354.237	10.0352	1004	8.15625
a24	R	353.927	8.19036	1004.32	7.78825
a25	C	354.308	7.83589	1004.93	7.48052
a26	R	353.982	9.83592	1004.02	9.13146
a27	C	354.072	8.09079	1004.63	8.28912
a28	R	353.54	11.7018	1004.53	12.7288
a29	C	354.372	9.18027	1004.87	8.25998
a30	R	354.003	7.95965	1004.45	7.63881
a31	C	353.689	9.35935	1004.21	10.0631
a32	R	353.866	8.61477	1004.33	8.23884
a33	C	354.295	8.37931	1005.14	7.56346
a34	R	354.858	7.96645	1005.31	7.56581
a35	C	354.218	8.14933	1004.84	7.82664
a36	R	353.069	13.2431	1003.46	13.2915
a37	C	353.57	9.28447	1004.13	8.93263
Chemically Abraded
180 °C, 4 hr
Zr09a		354.684	8.55689	1004.94	7.19834
Zr09b		354.351	9.42425	1004.76	9.39044
Zr11a		354.809	8.44633	1004.75	8.09824
Zr11b		355.355	7.44721	1005.57	5.81523
Zr14a		355.573	7.59171	1005.73	6.44911
Zr14b		355.573	7.59189	1005.73	6.44911
Zr16a		354.76	7.53508	1004.8	7.08105
Zr24a		355.291	7.91509	1005.51	7.59532
Zr24b		355.25	7.78391	1005.6	6.80595
Zr17a		356.543	6.46367	1007.58	4.76978
Zr20a		355.934	7.37696	1006.49	6.13358
Zr33a		356.074	7.60605	1006.58	6.70386
Zr35a		356.264	8.37804	1006.83	6.85075
Zr38a		354.415	12.3093	1004.55	11.9391
Zr53a		355.849	8.0545	1006.12	7.01458
Zr54a		355.65	8.00938	1005.79	7.03395
210 °C, 4 hr
Zr13a		355.88	9.45253	1006.2	7.95485
Zr14a		354.767	10.2993	1004.42	8.80661
Zr15a		354.029	11.3056	1003.18	9.41346
Zr23a		355.916	8.67175	1006.18	6.80989
Zr25a		355.897	9.19941	1006.11	8.67169
Zr27a		355.615	8.10544	1005.83	6.84756
Zr30a		355.871	7.98351	1005.9	7.34745
Zr36a		355.681	9.29719	1005.51	8.90042
Zr44a		354.531	11.0747	1003.8	9.65721
Zr45a		355.565	8.02788	1005.42	6.76584
Zr46a		353.919	10.677	1002.56	8.63575
Zr49a		355.081	10.941	1004.73	9.01401
Zr52a		354.872	9.33826	1004.79	8.65716
aR = rim, C = core
bRaman shifts for chemically abraded zircon samples are empirically corrected for downshifts caused by laser-induced heating of carbon coated samples. Estimated errors are ±1.0 cm-1.
cReported values are corrected for instrumental band broadening following the approach of Váczi et al. (2014) for a bandpass value of 1.5. Estimated 2σ uncertainties are 10%.
dAlpha dose values are calculated from v3(SiO4) FWHM values using the calibration presented by Váczi and Nasdala (2017) based on the work of Palenik et al. (2003).
eReported uncertainties reflect propagated v3(SiO4) FWHM analytical uncertainties.

## Sheet: KR18-04
Table S1 Cont'd. Raman data for zircon sample KR18-04.
Zircon	Analysis Positiona	Eg Raman Shift (cm-1)b	Eg FWHM (cm-1)c	v3(SiO4) Raman Shift (cm-1)b	v3(SiO4) FWHM (cm-1)c	alpha dose (α/g)d	2σ (α/g)e
Unannealed
u01	R	354.429	6.55159	1005.63	4.21842	1.42346e+17	2.5736e+16
u01	C	354.544	5.55277	1005.63	3.78294	1.15906e+17	2.2929e+16
u02	R	351.393	14.4229	1001.77	11.9136	6.83898e+17	9.6663e+16
u02	C	353.837	7.16815	1004.6	5.52999	2.24304e+17	3.541e+16
u03	R	354.47	6.16216	1005.29	4.43622	1.55711e+17	2.7502e+16
u03	C	354.165	7.10271	1005.01	4.85184	1.81481e+17	3.0708e+16
u04	R	354.953	4.99751	1006.21	2.62447	4.73267e+16	1.5482e+16
u04	C	354.924	5.17858	1006.17	3.19946	8.1052e+16	1.9176e+16
u05	R	354.989	6.35278	1006.16	3.83704	1.1917e+17	2.3056e+16
u05	C	354.638	5.76325	1005.22	3.57424	1.03365e+17	2.1251e+16
u06	R	354.346	7.12507	1005.51	4.93153	1.86463e+17	3.1162e+16
u06	C	354.344	6.31055	1005.56	4.55626	1.63118e+17	2.802e+16
u07	R	354.34	7.1206	1005.4	5.19341	2.02928e+17	3.2956e+16
u07	C	353.826	7.97382	1004.65	6.13124	2.63103e+17	4.0411e+16
u08	R	354.325	7.0286	1005.16	5.19477	2.03014e+17	3.2632e+16
u08	C	354.441	6.42589	1005.49	5.16219	2.00958e+17	3.2352e+16
u09	R	354.407	6.91318	1005.42	5.22273	2.04781e+17	3.3361e+16
u09	C	353.126	9.28112	1003.7	8.13749	3.9869e+17	5.6844e+16
u10	C	354.75	6.50599	1005.99	4.63978	1.68289e+17	2.9129e+16
u11	R	354.541	6.58098	1005.57	4.5095	1.60229e+17	2.7867e+16
u11	C	354.447	6.52996	1005.34	4.76077	1.75804e+17	2.9634e+16
u12	R	354.625	7.37382	1005.61	4.70806	1.72526e+17	2.9158e+16
u12	C	354.03	7.68491	1005.25	4.98331	1.89707e+17	3.1024e+16
u13	R	355.129	6.43408	1006.17	3.8612	1.2063e+17	2.3363e+16
u13	C	354.244	7.23912	1005.05	5.16499	2.01134e+17	3.2692e+16
Annealed
Zr14	R	355.629	4.79618	1007.35	3.14944
Zr14	C	355.476	4.83866	1007.25	3.08529
Zr15	R	355.85	4.66579	1007.56	3.14361
Zr15	C	355.316	5.61735	1006.79	5.01801
Zr16	R	355.259	4.84745	1006.72	2.46242
Zr16	C	355.187	4.93796	1006.88	2.73943
Zr17	R	354.486	5.43215	1005.15	2.88385
Zr17	C	355.559	4.6597	1006.89	2.44268
Zr18	R	355.064	5.16885	1006.76	3.60873
Zr18	C	354.958	4.95231	1006.6	3.29262
Zr19	R	355.347	5.19497	1007.22	3.78623
Zr19	C	355.024	4.78602	1006.29	3.28468
Zr20	R	355.457	4.30507	1006.71	2.45832
Zr20	C	355.335	4.65119	1006.85	3.78354
Zr21	R	355.576	4.55894	1006.46	3.09357
Zr21	C	355.227	4.68272	1006.61	3.01684
Zr22	R	355.369	4.27541	1006.6	2.32185
Zr22	C	355.623	3.73927	1006.89	1.61162
Zr23	R	355.595	3.82919	1006.96	1.72809
Zr23	C	355.511	3.88304	1006.85	2.17192
Zr24	R	355.432	4.68051	1006.81	2.73441
Zr24	C	355.714	4.0101	1007	2.1878
Zr25	R	355.844	3.95277	1007.04	1.78819
Zr25	C	355.818	3.64645	1007.17	1.64698
Zr26	R	355.396	4.27671	1006.73	2.55322
Zr26	C	355.794	3.93617	1007.12	1.81591
Zr27	R	355.646	4.29244	1006.8	2.66858
Zr27	C	355.332	5.06596	1006.54	3.26776
Zr28	R	355.108	4.81596	1006.5	3.20887
Zr28	C	355.461	4.35876	1006.83	2.22195
Zr29	R	355.729	4.0849	1006.8	2.12013
Zr29	C	355.344	4.68604	1006.65	3.19997
Zr30	R	355.668	4.03955	1006.98	2.25899
Zr30	C	355.366	4.99754	1006.54	3.63811
Zr31	R	354.711	5.56197	1006.2	4.35676
Zr31	C	354.862	5.35117	1006.3	4.02833
Zr31	R	355.046	5.7564	1006.13	4.96671
Zr32	R	355.725	4.11257	1006.99	2.38496
Zr32	C	355.437	4.30098	1006.69	2.66121
Zr33	R	355.839	4.20084	1007.14	1.92174
Zr33	C	355.809	4.32894	1006.9	2.30565
Zr34	R	355.972	3.94247	1007.22	1.90272
Zr34	C	355.59	4.08099	1007	2.57097
Chemically Abraded
180 °C, 12 hr
Zr27		355.723	4.8835	1007.84	3.35726
Zr28		356.159	4.25537	1008.07	1.91911
Zr29		356.084	4.31466	1008.03	1.88846
Zr34		355.764	4.57499	1008.01	2.47635
Zr37		355.795	4.58608	1007.82	2.36777
Zr37b		355.703	4.78037	1007.8	2.76627
Zr38		355.73	4.7445	1007.79	2.74028
Zr41		355.443	4.65351	1007.52	3.43254
210 °C, 12 hr
Zr13		355.028	5.67201	1006.37	3.02127
Zr15		355.304	4.93324	1007.07	2.86159
Zr16		354.883	5.75481	1006.69	4.53094
Zr17		355.367	5.15489	1007.02	2.76548
Zr21		355.561	4.13032	1007.63	2.2151
Zr23		355.332	5.19847	1007.07	3.11648
aR = rim, C = core
bRaman shifts for chemically abraded zircon samples are empirically corrected for downshifts caused by laser-induced heating of carbon coated samples. Estimated errors are ±1.0 cm-1.
cReported values are corrected for instrumental band broadening following the approach of Váczi et al. (2014) for a bandpass value of 1.5. Estimated 2σ uncertainties are 10%.
dAlpha dose values are calculated from v3(SiO4) FWHM values using the calibration presented by Váczi and Nasdala (2017) based on the work of Palenik et al. (2003).
eReported uncertainties reflect propagated v3(SiO4) FWHM analytical uncertainties.

## Sheet: BOM2A
Table S1 Cont'd. Raman data for zircon sample BOM2A.
Zircon	Analysis Positiona	Eg Raman Shift (cm-1)b	Eg FWHM (cm-1)c	v3(SiO4) Raman Shift (cm-1)b	v3(SiO4) FWHM (cm-1)c	alpha dose (α/g)d	2σ (α/g)e
Unannealed
u01	R	354.981	4.19309	1006.42	1.81099	6.22875e+14	6425999999999999
u01	C	354.521	5.69005	1005.78	3.65783	1.08378e+17	2.2179e+16
u02	R	354.644	6.06133	1005.82	4.22619	1.42822e+17	2.5842e+16
u02	C	354.174	6.24125	1005.44	4.87484	1.82918e+17	3.0581e+16
u03	R	354.78	4.66095	1006.26	2.57082	4.42105e+16	1.4972e+16
u03	C	354.992	4.65428	1006.17	2.58668	4.51312e+16	1.4846e+16
u04	R	355.308	4.14539	1006.49	2.04911	1.4174e+16	1.1769e+16
u04	C	354.678	6.54674	1005.95	4.14254	1.37712e+17	2.5483e+16
u05	R	355.136	4.77647	1006.41	2.81012	5.81494e+16	1.6565e+16
u05	C	355.199	4.21186	1006.44	2.0674	1.52192e+16	1.1891e+16
u07	R	355.053	4.55018	1006.28	2.23061	2.45692e+16	1.2732e+16
u07	C	354.706	4.99355	1006.04	2.63909	4.81764e+16	1.5315e+16
u08	R	355.058	4.26279	1006.45	1.85088	2.88642e+15	7967000000000000
u08	C	354.905	4.59854	1006.27	2.29488	2.82638e+16	1.3219e+16
u09	R	355.017	4.27517	1006.28	1.98365	1.04393e+16	1.1064e+16
u09	C	354.912	4.68391	1006.19	2.62317	4.72511e+16	1.5207e+16
u10	R	354.024	5.97909	1005.49	3.54235	1.01456e+17	2.1636e+16
u10	C	354.109	6.53445	1005.62	5.37933	2.14705e+17	3.4182e+16
Annealed
a05		356.058	4.09082	1007.52	2.66906
a09		355.014	4.50216	1007.01	2.76529
a10		355.282	4.67161	1006.97	2.99952
a14		355.076	4.21076	1006.88	2.24792
a24		353.994	5.92426	1005.92	5.1794
a25		354.832	4.96299	1006.69	3.25907
a27		354.971	4.28313	1006.86	2.42129
a34		354.721	4.80137	1006.67	3.1568
Chemically Abraded
180 °C, 12 hr
Zr01a		355.218	4.97687	1007.53	3.01575
Zr03		355.719	4.38566	1007.83	2.13204
Zr04a		356.521	4.61321	1008.49	2.42922
Zr05		356.402	4.59361	1008.25	2.47453
Zr06		355.702	4.49784	1007.71	2.30517
Zr08		355.438	4.44788	1007.45	2.01511
Zr09		355.141	4.87812	1007.08	2.80252
Zr10		355.709	4.1273	1007.92	1.90568
Zr11		356.104	3.89096	1008.35	1.60664
Zr13		354.994	4.9202	1006.74	2.5441
Zr14		355.456	4.5355	1007.53	2.15446
Zr16		355.243	4.83102	1007.03	2.32947
210 °C, 12 hr
Zr18		355.8	4.61742	1007.77	2.51586
Zr19		355.714	5.41309	1007.13	2.70566
Zr21		355.942	4.62569	1007.86	2.36103
Zr23		356.097	4.51196	1007.99	2.40347
Zr24		356.164	4.23908	1008.1	2.00698
Zr26		356.204	4.52823	1008.13	2.02015
Zr27		355.804	4.62013	1007.77	2.43883
Zr28		355.45	5.50976	1007.31	3.02497
Zr31		356.252	4.51656	1008.35	1.98631
Zr36		356.168	4.3812	1008.33	2.01234
Zr43		356.07	4.46215	1007.97	2.17103
Zr44		356.143	4.27355	1008.16	1.82496
Zr47		355.936	4.57152	1007.79	2.28718
aR = rim, C = core
bRaman shifts for chemically abraded zircon samples are empirically corrected for downshifts caused by laser-induced heating of carbon coated samples. Estimated errors are ±1.0 cm-1.
cReported values are corrected for instrumental band broadening following the approach of Váczi et al. (2014) for a bandpass value of 1.5. Estimated 2σ uncertainties are 10%.
dAlpha dose values are calculated from v3(SiO4) FWHM values using the calibration presented by Váczi and Nasdala (2017) based on the work of Palenik et al. (2003).
eReported uncertainties reflect propagated v3(SiO4) FWHM analytical uncertainties.
