# Supplementary material for: Chemical Abrasion: The Mechanics of Zircon Dissolution
Source: Copernicus journal article supplement (doi:10.5194/gchron-2022-19), 2022-07-26
Supplement: Supplementary file 3 [file Table_S2.xlsx]

## Sheet: Sheet1
Table S2. Volume and surface area estimates of zircon crystals before and after chemical abrasion determined using the segmentation function in Dragonfly.
		Before				After
Sample	T (°C)	Voxels	Volume (µm3)	Surface Area (µm2)	S/V (µm-1)a	Voxels	Volume (µm3)	Surface Area (µm2)	S/V (µm-1)a	∆V (%)
BOM2A
Zr01	180	205840	867250	53875.1	0.0621218	191217	805610	55226	0.0685518	-7.10751
Zr02	180	221772	934375	56684.6	0.0606659	210114	885224	54427.8	0.0614848	-5.26027
Zr03	180	269519	1.13554e+06	63432.2	0.0558606	260678	1.09825e+06	64705.1	0.0589163	-3.28388
Zr05	180	236911	998159	53572.1	0.0536709	225128	948479	52389.1	0.0552348	-4.97713
Zr06	180	261092	1.10004e+06	75169.2	0.0683332	249137	1.04963e+06	76561	0.0729409	-4.58239
Zr08	180	281642	1.18662e+06	70105.7	0.0590801	265264	1.11757e+06	67933.2	0.0607863	-5.81868
Zr09	180	202346	852529	52140.5	0.0611598	187712	790843	50778.3	0.0642078	-7.23561
Zr10	180	175305	738599	52858.4	0.0715658	163203	687585	51197.7	0.0744602	-6.90686
Zr11	180	552333	2.3271e+06	103884	0.0446411	526726	2.21913e+06	105014	0.0473221	-4.6397
Zr12	180	271219	1.14271e+06	61549.3	0.0538628	256505	1.08067e+06	61127.8	0.0565646	-5.42865
Zr13	180	124953	526455	35882.5	0.0681588	116518	490898	34808.6	0.0709081	-6.754
Zr14	180	255102	1.0748e+06	62365.3	0.058025	245231	1.03317e+06	61945.5	0.0599565	-3.873
Zr15	180	190021	800601	47500.9	0.0593316	183916	774850	46044.2	0.0594234	-3.2164
Zr16	180	212642	895908	56050.9	0.0625633	203085	855610	55020.5	0.0643055	-4.49796
Zr20	180	369588	1.55716e+06	94088.4	0.0604232	334109	1.40762e+06	91423.9	0.0649491	-9.60297
Zr18	210	211580	891434	50253.4	0.0563737	148715	626546	40984.2	0.0654129	-29.7148
Zr21	210	307247	1.2945e+06	63094.5	0.0487404	213696	900315	59835.3	0.0664604	-30.4507
Zr23	210	186422	785437	53882.3	0.0686017	131070	552207	41918.3	0.0759106	-29.6944
Zr24	210	260730	1.09851e+06	60168.7	0.0547728	191474	806693	48974.3	0.0607101	-26.5651
Zr25	210	205331	865105	67325.5	0.0778235	163862	690361	54622.3	0.0791214	-20.1991
Zr26	210	175943	741287	48320.1	0.0651841	119928	505265	36820.7	0.0728741	-31.8395
Zr27	210	160784	677419	44911.2	0.0662975	106365	448123	39812.4	0.0888426	-33.8485
Zr28	210	133477	562368	39534.7	0.0703004	66265	279179	30512.8	0.109295	-50.3566
Zr30	210	190008	800546	57592.8	0.0719419	142156	598913	50311.9	0.0840054	-25.187
Zr31	210	544440	2.29385e+06	128454	0.0559993	424781	1.78963e+06	134940	0.0754012	-21.9813
Zr32	210	162927	686448	45534.7	0.0663338	91404	385091	38974.8	0.101209	-43.9009
Zr33	210	226241	953204	59532	0.0624547	147718	622346	50104.2	0.0805087	-34.7101
Zr34	210	170760	719450	44272.1	0.061536	112504	473987	41770.9	0.0881266	-34.1182
Zr35	210	229401	966517	57110.2	0.0590887	142873	601933	56133.4	0.0932552	-37.7214
Zr36	210	799316	3.3677e+06	128496	0.0381555	670409	2.82448e+06	114622	0.0405815	-16.1303
Zr37	210	308231	1.29865e+06	83062.6	0.0639609	209528	882755	71989	0.0815503	-32.0249
Zr38	210	164491	693037	45629.4	0.0658398	99747	420241	33422.9	0.0795328	-39.3625
Zr40	210	256328	1.07997e+06	69834.9	0.0646639	182350	768253	54969.2	0.0715509	-28.8633
Zr43	210	381086	1.6056e+06	77295.1	0.048141	276226	1.16376e+06	65590.1	0.0563605	-27.5188
Zr44	210	407301	1.71605e+06	88219.8	0.0514087	290574	1.22421e+06	71748.1	0.0586078	-28.6613
Zr45	210	218692	921398	49328.1	0.0535362	151564	638549	37858.8	0.0592889	-30.6978
Zr46	210	250577	1.05574e+06	68700.5	0.0650735	165742	698282	68880.8	0.0986432	-33.8583
Zr51	210	66992	282252	28698.3	0.101676	41411	174467	21720	0.124493	-38.1875
KR18-04
Zr24	180	112332	473280	35917.3	0.0758903	104024	438260	35609.6	0.0812522	-7.39937
Zr27	180	159941	673867	41886.7	0.0621588	152689	643289	40436.4	0.0628589	-4.53772
Zr38	180	198824	837690	52999.6	0.0632688	182601	769310	50599.4	0.0657724	-8.16289
Zr29	180	120800	508957	40931.7	0.0804226	103227	434902	36886.2	0.084815	-14.5504
Zr32	180	89184	375752	31493.3	0.0838142	84093	354289	30615.4	0.0864135	-5.71193
Zr36	180	148675	626401	45915.7	0.0733009	120903	509372	46933.3	0.0921395	-18.6827
Zr38	180	68183	287270	25745.2	0.0896203	63896	269198	24755.1	0.0919586	-6.29097
Zr40	180	121787	513116	39954.7	0.0778669	117832	496434	39648.5	0.0798666	-3.25107
Zr42	180	150815	635417	43394.2	0.0682924	139038	585776	41564.6	0.0709564	-7.81233
Zr43	180	352029	1.48318e+06	76901.2	0.051849	336673	1.41843e+06	79092.8	0.055761	-4.36569
Zr44	180	365931	1.54175e+06	84141.9	0.0545756	331158	1.39519e+06	83360.9	0.0597488	-9.50597
Zr45	180	249383	1.05071e+06	64674.6	0.0615534	232924	981324	66905.9	0.0681792	-6.60336
Zr08	210	104817	441617	33318.4	0.0754464	46129	194345	24986.8	0.12857	-55.9926
Zr10	210	94604	398588	30890.2	0.0774991	52609	221645	22286.6	0.100551	-44.3924
Zr11	210	78540	330906	25721.3	0.0777298	52418	220840	18691.8	0.0846394	-33.262
Zr13	210	79369	334399	26892.6	0.0804207	48145	202838	19438.5	0.0958326	-39.3425
Zr16	210	126439	532716	36851.8	0.0691772	65468	275821	27250.3	0.0987971	-48.2236
Zr21	210	143340	603923	39414.4	0.0652639	85298	359366	31094.2	0.0865251	-40.4947
Zr23	210	143456	604412	38439.4	0.063598	101141	426114	29732.8	0.0697768	-29.4995
aSurface area to volume ratio
