# Supplementary material for: Chemical Abrasion: The Mechanics of Zircon Dissolution
Source: Copernicus journal article supplement (doi:10.5194/gchron-2022-19), 2022-07-26
Supplement: Supplementary file 4 [file Table_S3.xlsx]

## Sheet: Sheet1
Table S3. Length of crystallographic axes measured before and after chemical abrasion using the ruler function in Dragonfly.
		Before				After
Sample	T (°C)	c (µm)	a1 (µm)	a2 (µm)	Aspect Ratioa	c (µm)	a1 (µm)	a2 (µm)	Aspect Ratioa	∆c (%)	∆a1 (%)	∆a2 (%)	∆ Aspect Ratio (%)
BOM2A
Zr02	180	184.03	76.85	97.22	2.11444	170.475	77.8	93.65	1.98863	-7.36565	1.23617	-3.67208	-5.95006
Zr03	180	195.365	78.83	108.19	2.08924	187.95	77.87	104.88	2.05691	-3.79546	-1.21781	-3.05943	-1.54762
Zr05	180	152.945	103.02	105.25	1.46872	142.065	100.29	103.91	1.39143	-7.11367	-2.64997	-1.27316	-5.26231
Zr06	180	228.315	65.99	109.85	2.59685	217.94	65.35	112.05	2.45705	-4.54416	-0.969844	2.00273	-5.38357
Zr12	180	183.085	91.89	107.36	1.83774	170.59	91.16	107.66	1.71602	-6.8247	-0.794428	0.279434	-6.62318
Zr14	180	182.51	92.54	96.19	1.93409	166.955	90.3	94.72	1.80472	-8.52282	-2.42057	-1.52823	-6.68853
Zr15	180	153.005	87.5	90.04	1.72361	144.485	85.28	87.69	1.67064	-5.56845	-2.53714	-2.60995	-3.07349
Zr18	210	171.51	79.44	93.7	1.98117	126.62	77.6	92.19	1.49149	-26.1734	-2.31621	-1.61153	-24.7168
Zr25	210	254.68	61.26	70.69	3.86025	223.99	59.58	71.05	3.42938	-12.0504	-2.74241	0.509266	-11.1617
Zr27	210	146.035	80.69	87.82	1.73325	110.1	80.83	89.3	1.2943	-24.6071	0.173504	1.68527	-25.325
Zr30	210	197.195	74.07	83.13	2.50884	158.39	74.52	83.73	2.00177	-19.6785	0.607533	0.721761	-20.2114
Zr31	210	364.145	89.42	94.93	3.95058	321.3	86.59	95.55	3.52806	-11.7659	-3.16484	0.653113	-10.6953
Zr34	210	157.445	81.73	83.76	1.90277	114.22	79.52	82.07	1.4137	-27.454	-2.70403	-2.01767	-25.7031
Zr38	210	144.795	75.23	94.85	1.70267	99.08	76.52	94.14	1.16114	-31.5722	1.71474	-0.74855	-31.8048
Zr45	210	163.58	93.44	94.67	1.7392	116.265	94.08	94.61	1.23234	-28.9247	0.684932	-0.0633781	-29.1432
Zr46	210	189.01	81.72	85.22	2.26441	146.07	79.73	85.6	1.76701	-22.7184	-2.43514	0.445905	-21.9658
KR18-04
Zr24	180	150.38	54.44	77.86	2.27332	134.36	55.05	76.77	2.03854	-10.653	1.1205	-1.39995	-10.3277
Zr27	180	138.695	75.9	82.94	1.74635	137.92	73.78	82.57	1.76425	-0.55878	-2.79315	-0.446106	1.0249
Zr36	180	142.215	68.5	90.22	1.79202	129.045	68.95	89.79	1.62587	-9.26063	0.656934	-0.476613	-9.27206
Zr38	180	138.085	48.36	60.83	2.52926	129.97	47.41	59.08	2.44098	-5.87682	-1.96443	-2.87687	-3.49037
Zr40	180	190.82	53.18	61.4	3.33077	183.215	53.56	60.23	3.22023	-3.98543	0.714554	-1.90554	-3.31884
Zr42	180	159.19	70.17	76.2	2.17517	139.915	70.22	75.36	1.92217	-12.1082	0.0712555	-1.10236	-11.6312
Zr43	180	224.365	97.78	109.45	2.16537	218.35	95.11	108.25	2.14742	-2.6809	-2.73062	-1.09639	-0.828889
Zr45	180	209.52	74.35	89.63	2.55543	188.845	75.59	87.68	2.31328	-9.86779	1.66779	-2.17561	-9.47584
Zr11	210	115	59.32	66.42	1.82917	77.86	59.63	66.36	1.23597	-32.2957	0.522589	-0.0903342	-32.43
Zr13	210	123.84	57.24	59.67	2.11855	87.53	54.94	59.15	1.5344	-29.3201	-4.01817	-0.87146	-27.5731
Zr23	210	139.57	75.13	93.7	1.65338	105.995	72.63	92.22	1.28596	-24.056	-3.32757	-1.57951	-22.2225
aAspect ratio is calculated as c/aavg
