# Supplementary material for: Chemical Abrasion: The Mechanics of Zircon Dissolution
Source: Copernicus journal article supplement (doi:10.5194/gchron-2022-19), 2022-07-26
Supplement: Supplementary file [file gchron-2022-19-RC1-supplement.pdf]

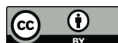

1 **Chemical Abrasion: The Mechanics of Zircon Dissolution**

2

3 Alyssa J. McKanna<sup>1</sup>, Isabel Koran<sup>1</sup>, Blair Schoene<sup>1</sup>, and Richard A. Ketcham<sup>2</sup>

4

5 <sup>1</sup>*Department of Geosciences, Guyot Hall, Princeton University, Princeton, NJ 08544, USA*

6 <sup>2</sup>*Jackson School of Geosciences, The University of Texas Austin, Austin, TX 78712, USA*

7

8 *Correspondence: Alyssa J. McKanna (alyssaa@princeton.edu)*



## 9 Abstract

10 Chemical abrasion is a technique that combines laboratory annealing and partial  
11 dissolution in hydrofluoric acid (HF) to selectively remove radiation-damaged portions  
12 of zircon crystals prior to U-Pb isotopic analysis, and it is applied ubiquitously to zircon  
13 prior to U-Pb isotope dilution thermal ionization mass spectrometry (ID-TIMS). The  
14 mechanics of zircon dissolution in HF and the impact of different leaching conditions  
15 on the zircon structure, however, are poorly resolved. We present a microstructural  
16 investigation that integrates microscale X-ray computed tomography ( $\mu$ CT), scanning  
17 electron microscopy, and Raman spectroscopy to evaluate zircon dissolution in HF. We  
18 show that  $\mu$ CT is an effective tool for imaging metamictization and complex dissolution  
19 networks in three dimensions. We find that most grains do not dissolve predominantly  
20 from rim-to-core. Acid frequently reaches crystal interiors via fracture networks  
21 spatially associated with radiation damage zoning and inclusions to dissolve higher U  
22 zones, material in the vicinity of fractures, and some inclusions. Other acid paths to  
23 crystal cores include the dissolution of surface-reaching inclusions and the percolation  
24 of acid across zones with high defect densities. In highly crystalline samples dissolution  
25 is crystallographically-controlled with dissolution proceeding almost exclusively along  
26 the *c*-axis. Increasing the leaching temperature from 180 °C to 210 °C results in deeper  
27 etching textures, wider acid paths, more complex internal dissolution networks, and  
28 greater volume losses. We discuss the implications of our findings for zircon ID-TIMS  
29 U-Pb geochronology and paired trace element analyses, radiation damage annealing  
30 models, and for using  $\mu$ CT for imaging radiation damage zoning for (U-Th)/He  
31 thermochronology.

32



### 33 1 Introduction

34

35 Zircon U-Pb dating by isotope dilution thermal ionization mass spectrometry (ID-TIMS)  
36 produces high-precision dates that the Earth science community depends on to calibrate  
37 geologic time (Bowring and Schmidt, 2003; Schoene, 2014). Zircon crystals affected by  
38 radiation damage – caused by alpha recoil events in the  $^{238}\text{U}$ ,  $^{235}\text{U}$ , and  $^{232}\text{Th}$  decay series  
39 and the spontaneous fission of  $^{238}\text{U}$  (Holland and Gottfried 1955; Weber et al., 1990;  
40 Murakami et al., 1991; Meldrum et al. 1998; Trachenko et al., 2002; Ewing et al., 2003) –  
41 can lose radiogenic Pb by diffusion, leaching, or recrystallization compromising the  
42 accuracy of U-Pb ages (Mezger, 1997; Nasdala et al., 1998; Geisler et al., 2002). Pb-loss  
43 can sometimes be identified graphically on a concordia diagram when there is a  
44 mismatch between the  $^{238}\text{U}/^{206}\text{Pb}$  and the  $^{235}\text{U}/^{207}\text{Pb}$  isotopic clocks, but sometimes  
45 discordia lines closely track concordia making Pb-loss difficult to detect, thereby  
46 complicating age interpretations from zircon datasets (Mezger, 1997; Schoene, 2014).

47 Chemical abrasion, a technique that combines laboratory annealing to induce partial  
48 structural recovery and leaching in hydrofluoric acid (HF) to selectively remove soluble,  
49 radiation-damaged portions of crystals prior to U-Pb isotopic analysis, revolutionized  
50 the field's ability to date zircon crystals affected by open system behavior (Mundil et al.,  
51 2004; Mattinson, 2005; 2011). Still, many chemically abraded U-Pb zircon datasets  
52 exhibit anomalously young, concordant dates that are often attributed to residual Pb-  
53 loss (Davydov et al., 2010; Schoene et al., 2010a; Schmidt and Davydov, 2012; Meyers  
54 et al., 2012). Undetected residual Pb-loss can potentially bias critical geologic  
55 interpretations such as correlations between terrestrial flood volcanism and biotic crises  
56 where ~100 ka precision and accuracy matter (Schoene et al., 2010a), or other correlated  
57 biostratigraphic and radioisotopic calibrations constructed to study key climate  
58 transitions in Earth history (Schmidt and Davydov, 2012). This ongoing challenge has  
59 recently prompted the ID-TIMS U-Pb community to more closely evaluate how  
60 different chemical abrasion protocols – which can vary considerably both within and  
61 between individual laboratories – affect geochronological results (Huyskens et al., 2016;  
62 Widmann et al., 2019).

63 Despite the near-universal acceptance of chemical abrasion, the mechanics of zircon  
64 dissolution during acid digestion are poorly understood, and several outstanding  
65 questions remain. Do most zircon crystals predominantly dissolve from rim to core?  
66 How does acid reach crystal interiors to dissolve metamict zones? Does partial  
67 dissolution effectively remove all mineral and melt inclusions? How does changing the  
68 temperature and duration of leaching affect the zircon structure? It is not unreasonable  
69 to assume that a zircon grain predominantly dissolves from rim to core, since crystal  
70 rims are often enriched in actinides and radiation damage relative to crystal cores



71 (Mattison, 2005; 2011). However, acid has been observed to reach grain interiors  
72 presumably via either pre-existing fractures or soluble radiation damage networks  
73 formed by interconnected fission or alpha recoil tracks, much like how natural fluids  
74 are thought to leach radiogenic Pb from grain interiors (Mundil et al., 2004; Mattinson,  
75 2005; 2011). Despite some qualitative observations, none of these hypotheses have been  
76 rigorously tested nor leveraged to gain a mechanistic understanding of the annealing  
77 and leaching process.

78  
79 A basic understanding of the microstructural processes that occur during partial  
80 dissolution in HF acid is needed to improve Pb-loss mitigation efforts and ensure the  
81 accuracy of high-precision ID-TIMS zircon U-Pb dates. In this study, we present the first  
82 three-dimensional (3D) view of zircon dissolution based on microscale X-ray computed  
83 tomography data ( $\mu$ CT) acquired before and after leaching in HF. We evaluate both  
84 zircon crystals with different radiation damage levels as well as different leaching  
85 conditions (180 °C vs. 210 °C, 4 h vs. 12 h). These data are paired with secondary  
86 electron images of etched grain surfaces and Raman spectral data used to characterize  
87 radiation damage and track changes in zircon crystallinity. In addition to achieving  
88 valuable new insights into the mechanics of zircon dissolution, our  $\mu$ CT data reveal  
89 exciting opportunities for quickly and non-destructively imaging radiation damage  
90 zoning in zircon in 3D which has broader implications for zircon chronology.

91

## 92 **2 Methods**

93

### 94 **2.1 Samples**

95

96 Our study focuses on four zircon samples (AS3, SAM-47, KR18-04, and BOM2A) that  
97 together span nearly the full radiation damage spectrum. AS3 is an intermediate-to-  
98 high damage sample from the Mesoproterozoic Duluth Complex anorthositic series,  
99 emplaced during the North American Midcontinent Rift (Paces and Miller, 1993;  
100 Schmitz et al., 2003; Takehara et al., 2018; Swanson-Hysell et al., 2020). The sample of  
101 AS3 used in this study is the same as that studied by Takehara et al. (2018) ~~which was~~  
102 collected from the same locality as that of Paces and Miller (1993) (92°09'32.4",  
103 46°45'43.4"). AS3 crystals are coarse-grained, orange to orangish-brown, and fractured.  
104 Most grains are tabular prisms or anhedral shards and many show evidence of  
105 hydrothermal alteration (Takehara et al., 2018). SAM-47 is an intermediate-to-high  
106 damage Archean sample from the Corunna Downs granitoid complex of the Pilbara  
107 Craton (89°59'55.97", 100°08'2.38"). Grains are euhedral, brown, and translucent. KR18-  
108 04 is an intermediate-to-low damage sample from a Neoproterozoic rhyolite body  
109 associated with the glaciolacustrine Konnarock Formation of Virginia, USA  
110 (MacLennan et al., 2020) (36°41'47.95", 81°24'22.08"). Grains are small, transparent, pink-

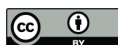

111 orange and prismatic. BOM2A is our lowest-damage sample from a Paleocene trachyte  
112 dike in Mumbai, India associated with rifting following the main phase of Deccan Traps  
113 volcanism (Basu et al., 2020). Crystals are small, transparent, colorless, and prismatic.  
114  
115 Aliquots of unannealed and annealed (900 °C for 48hr) grains from each of the four  
116 zircon samples were ~~set aside at the start of the study~~, mounted, polished, and  
117 characterized using Raman spectroscopy to quantify the degree of radiation damage  
118 ~~present in each sample~~, as key bands in the zircon Raman spectrum broaden  
119 predictably with increasing damage (Nasdala et al., 2001; Palenik et al., 2003; Váczi and  
120 Nasdala, 2017). Annealed grain mounts were also imaged using optical microscopy,  
121 cathodoluminescence (CL) ~~imaging~~, and/or backscattered electron (BSE) ~~imaging~~ to  
122 characterize growth textures ~~for each sample~~ (Fig. 1).  
123

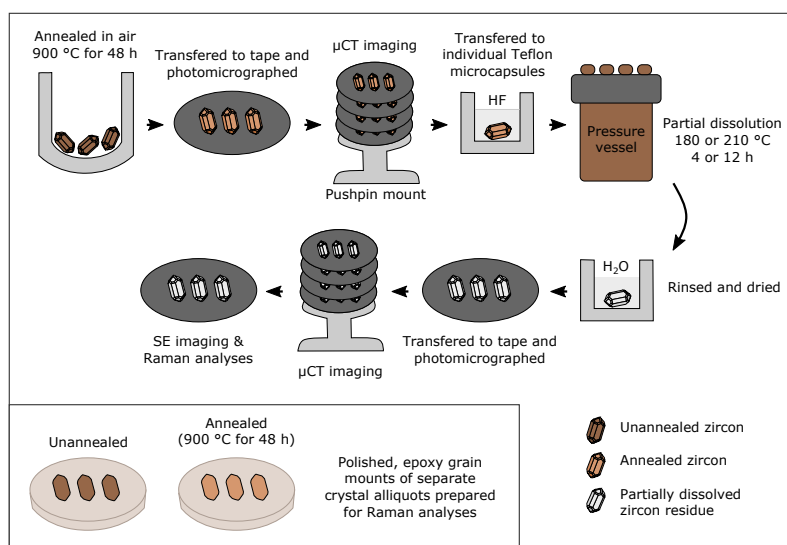

Figure 1: Summary of our experimental workflow.

124  
125

## 126 2.2 Workflow for partial dissolution experiments

127

128 A diagram depicting our experimental workflow is presented in Fig. 1. ~~Separate~~  
129 aliquots of the four zircon samples were annealed in quartz crucibles in air at 900 °C for  
130 48 hours in a box furnace. Annealed grains were mounted on sticky tape (~6 mm  
131 diameter circles fashioned using a hole punch) and imaged using optical microscopy.  
132 The ~~four~~ sticky tape mounts were then stacked on top of a pushpin and loosely secured  
133 with tape for μCT imaging (Cooperdock et al., 2016,). After imaging, grains were  
134 removed from the sticky tape and transferred to ~~individual~~ Teflon microcapsules for  
135 leaching in concentrated HF in a Parr Instrument Company pressure digestion vessel at  
136 180 °C or 210 °C for a duration of 4 or 12 h. The chosen temperatures bracket the range



137 commonly used for chemical abrasion by the ID-TIMS U-Pb community (Huyskens et  
138 al., 2016; Widmann et al., 2019). Leaching durations were selected based on a sample's  
139 initial radiation damage content. Most intermediate-to-high damage zircon crystals  
140 (AS3 and SAM-47) were chemically abraded at shorter durations to ensure that intact  
141 zircon residues remained (as opposed to dust), although one subset of AS3 grains were  
142 leached at 180 °C for the full 12 h. The intermediate-to-low damage samples (KR18-04  
143 and BOM2A) maintained structural integrity over longer leaching durations, so grains  
144 were leached for the full 12 h period commonly used for chemical abrasion.

145

146 After partial dissolution, residues – the portions of zircon crystals that survive chemical  
147 abrasion – were rinsed in Milli-Q water, dried down, and carefully transferred to fresh  
148 sticky tape. Mounted residues were then re-imaged using optical microscopy and  $\mu$ CT  
149 to generate a “before” and “after” imagery dataset. Microphotographs of annealed  
150 grains and chemically abraded zircon residues are presented in Fig. 2. Following  $\mu$ CT,  
151 residue mounts were carbon coated, and secondary electron (SE) images of residue  
152 surfaces were acquired using a scanning electron microscope (SEM). Raman spectra  
153 were measured for a subset of zircon residues to characterize samples' crystallinities.

154

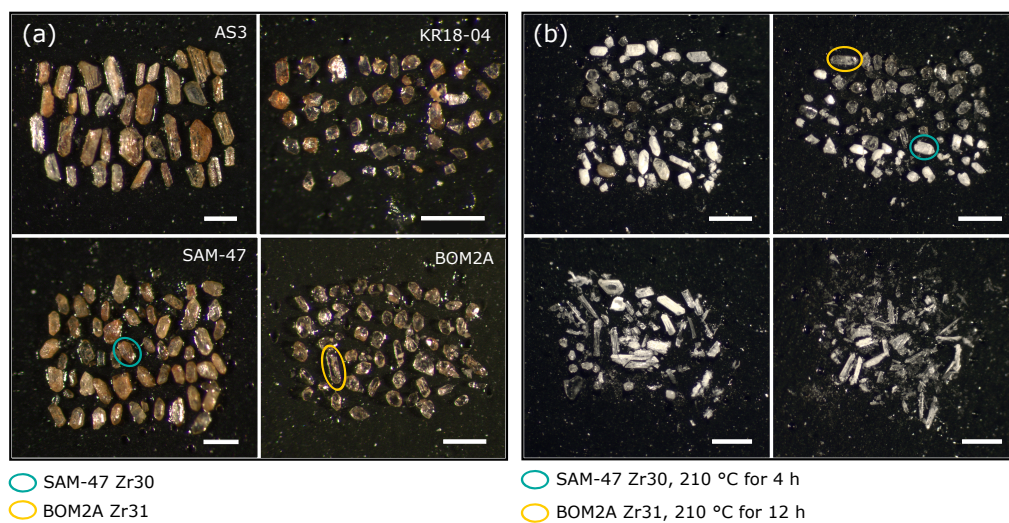

Figure 2: Photomicrographs of zircon crystals mounted on tape for  $\mu$ CT imaging. (a) Photomicrograph of annealed grains prior to chemical abrasion (b) Photomicrograph of chemically abraded zircon residues. Each tape mount in this image has a mixture of different zircon samples treated at different leaching conditions.

155

156

157

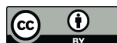

## 158 2.3 Instrumentation and analyses

159

160 Chemical abrasion was carried out using equipment and clean lab space at Princeton  
161 University. CL and BSE ~~electron~~ images of polished mounts were acquired using the  
162 XL30 FEG SEM at the PRISM Imaging and Analysis Center at Princeton University  
163 equipped with a mini-Gatan CL detector and a semiconductor BSE detector. Most  
164 images were acquired using a 10 kV accelerating voltage, 10 mm working distance, and  
165 spot size 4. SE images of chemically abraded zircon residues were captured using the  
166 Quanta FEG 200 Environmental-SEM also at the PRISM Imaging and Analysis Center.  
167 This system is equipped with a Schottky field emission gun and Everhart-Thornley  
168 secondary electron detector. SE images were acquired using low vacuum mode (~0.4 to  
169 0.8 Torr) to minimize charging due to sample topography. Scans used a 10 kV  
170 accelerating voltage, 10 to 10.5 mm working distance, and spot size 4 or 5.

171

172 All X-ray computed tomography data were collected at the High-Resolution X-ray  
173 Computed Tomography Facility at the University of Texas at Austin using a Zeiss  
174 Xradia 620 Versa. Measurements were made with X-rays set to 120 kV and 15 W and  
175 prefiltered with the LE3 filter. For each scan 2401 views were obtained over a 360°  
176 rotation at 4 s per view on the 4x detector. 16-bit TIFF images were reconstructed at  
177 1.62  $\mu\text{m}/\text{voxel}$ , using a beam hardening correction setting of 1.8 in the Xradia  
178 Reconstructor software. All 2D and 3D visualizations presented were rendered using  
179 Object Research Systems (ORS) Dragonfly software.

180

181 Raman spectra were acquired using the Horiba LabRAM Evolution Raman  
182 spectrometer in the High-Pressure Mineral Physics Laboratory at Princeton University.  
183 This confocal system is equipped with 532 nm and 632.81 nm diode lasers and a  
184 thermoelectrically cooled CCD detector. The instrument was calibrated daily using the  
185 silicon 520.7  $\text{cm}^{-1}$  Raman band and the automated protocol implemented within the  
186 Horiba Scientific LabSpec6 software. Additionally, a quartz reference spectrum was  
187 acquired daily to verify the accuracy of measured peak positions. All measurements  
188 were made using an 1800 g/mm grating, a 100  $\mu\text{m}$  slit, and a 400 to 100  $\mu\text{m}$  confocal pin  
189 hole. This setup has a spectral resolution better than 2  $\text{cm}^{-1}$  and a spatial resolution of ~2  
190  $\mu\text{m}$ . Polynomial background subtractions and Gaussian-Lorentzian peak fits were made  
191 using LabSpec6 software. Peak widths have estimated uncertainties on the order of 10%  
192 ( $2\sigma$ ) based on tests of measurement and peak fit reproducibility. All reported peak  
193 widths (full width at half maximum, FWHM) have been corrected for instrumental  
194 broadening following the approach of Váczi (2014).

195

## 196 3 Results

197



### 198 3.1 Images of polished grain mounts

199

200 SEM and reflected light images of annealed AS3 and SAM-47 grains are presented in  
201 Fig. 3. CL images of AS3 grains reveal broad oscillatory or convoluted compositional  
202 zoning patterns with evidence of hydrothermal alteration. Many crystals are finely  
203 fractured, and some have large melt inclusions that are commonly oriented parallel to  
204 the *c*-axis. Some fractures and alteration zones are observed to cross-cut compositional  
205 zones. SAM-47 crystals were not CL luminescent. Reflected light images acquired under  
206 the Raman microscope, however, show that most grains have fine-scale concentric  
207 growth zoning. BSE images reveal that some crystals are finely fractured and host  
208 inclusions. Many of these inclusions are cross-cut by fractures. SEM images of annealed  
209 KR18-04 and BOM2A zircon grains are presented in Fig. 4. Both samples have ~~typical~~  
210 ~~magmatic~~ growth patterns including some oscillatory zoning and some faint, broad

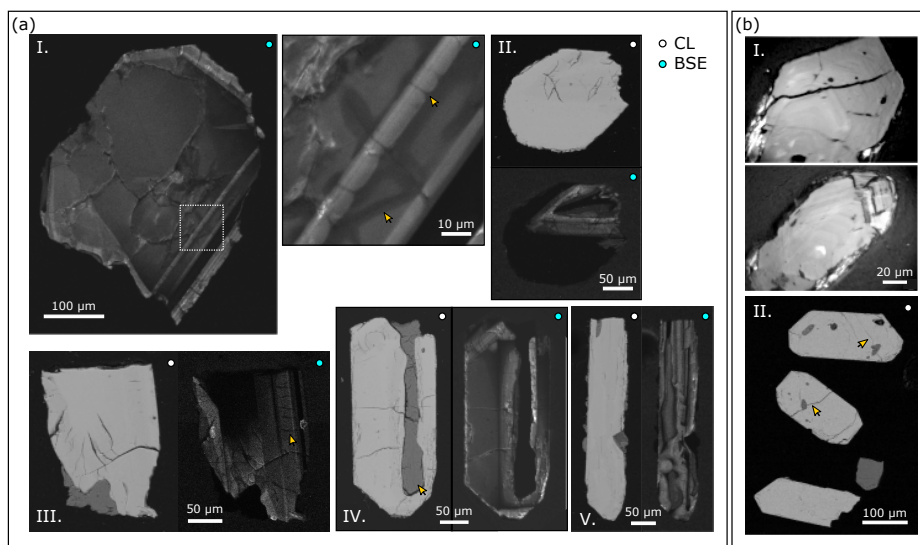

Figure 3: Representative images of annealed AS3 and SAM-47 zircon that have not been treated by chemical abrasion. **(a)** SEM images of annealed AS3 zircon. I. A zircon with simple growth zoning. Arrows highlight dark hydrothermal alteration zones associated with fine-scale fractures. Some fractures cross-cut compositional zones. II. Zircon with an unfractured metamict rim and a fractured core. III. Zircon with row of fractures that cross-cuts a compositional zone. IV. Zircon with a large melt inclusion oriented parallel to the *c*-axis. V. Zircon with convolute growth zoning. **(b)** Representative images of annealed SAM-47 zircon. I. Reflected light images showing fine-scale concentric growth zoning. II. BSE images showing that some grains are finely fractured. Some of these fractures pass through mineral inclusions (arrows).



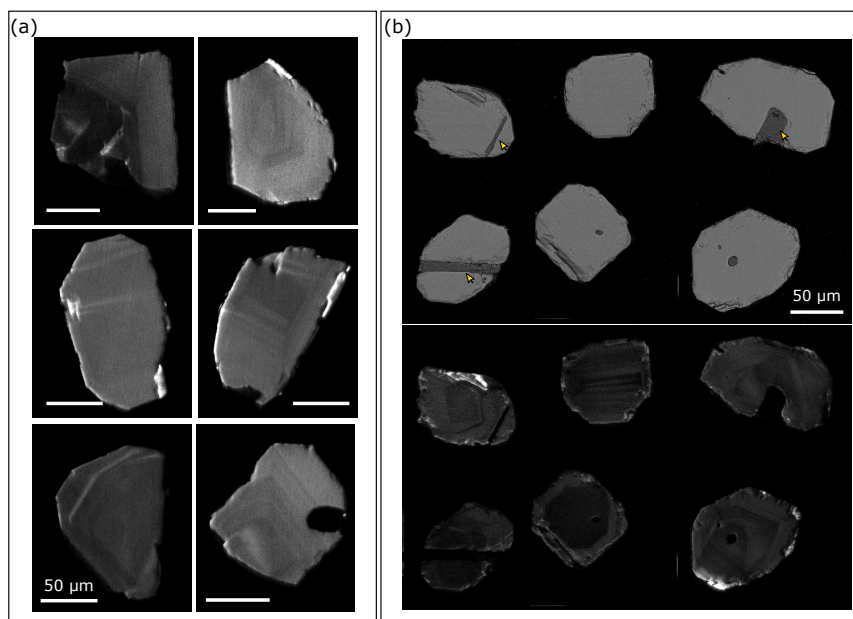

Figure 4: Representative images of annealed KR18-04 and BOM2A zircon that have not been treated by chemical abrasion. (a) CL images of annealed KR18-04 zircon with typical magmatic growth patterns. All scale bars are 50  $\mu\text{m}$ . (b) Representative BSE (top) and CL (bottom) images of annealed BOM2A zircon showing typical magmatic growth zoning. Arrows highlight the frequent occurrence of apatite inclusions.

211 zones. Fractures are rare. BOM2A crystals frequently have needle-like apatite  
212 inclusions, many of which are surface reaching.

213

### 214 3.2 Raman spectroscopy

215

#### 216 3.2.1 Polished grain mounts

217

218 Key bands in the zircon Raman spectrum – most notably the  $\nu_3(\text{SiO}_4)$  Si-O asymmetric  
219 stretching band near  $\sim 1008 \text{ cm}^{-1}$  and the external  $E_g$  mode near  $\sim 357 \text{ cm}^{-1}$  – broaden and  
220 shift to lower frequencies with increasing radiation damage (Nasdala et al. 1995, Zhang  
221 et al. 2000, Nasdala et al. 2001, Anderson et al. 2020a, Härtel et al. 2021). Measured  
222  $\nu_3(\text{SiO}_4)$  and  $E_g$  peak widths and positions are reported in Table S1. We derive alpha  
223 dose estimates ( $\alpha/\text{g}$ ) for each sample using the calibration presented by Váczi and  
224 Nasdala (2017) for the  $\nu_3(\text{SiO}_4)$  peak width.

225

226 Raman data for unannealed AS3 and SAM-47 indicate intermediate-to-high degrees of  
227 radiation damage with strong inter- and intra-crystalline variations (Fig. 5a). Estimated

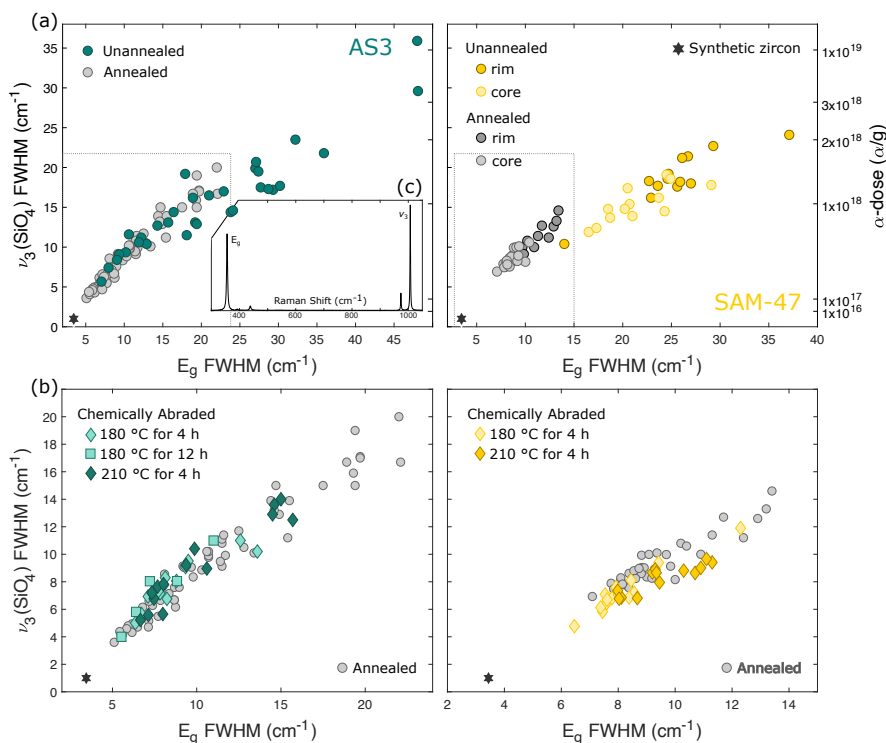

Figure 5: Raman  $\nu_3(\text{SiO}_4)$  and  $E_g$  peak width data for intermediate-to-high damage samples AS3 (left) and SAM-47 (right). **(a)** Results for unannealed and annealed (900 °C for 48 hour) zircon samples. Alpha dose estimates for unannealed zircon samples derived from  $\nu_3(\text{SiO}_4)$  peak width measurements are shown on the right y-axis (Váczi and Nasdala, 2017). Gray boxes mark the plot area presented in (b). **(b)** Results for annealed zircon samples and chemically abraded zircon residues. **(c)** Representative spectrum of synthetic zircon with peak assignments.

228 alpha doses for AS3 range from  $\sim 2 \times 10^{17}$  α/g to  $> 1 \times 10^{19}$  α/g (the saturation value for  
 229 Raman-derived damage estimates). CL black regions that yielded anomalous zircon  
 230 spectra with fluorescent artifacts indicative of altered material were excluded from  
 231 radiation damage estimates. Estimated alpha doses for unannealed SAM-47 samples  
 232 range from  $\sim 6 \times 10^{17}$  α/g to  $2 \times 10^{18}$  α/g. Crystal rims in SAM-47 samples have  
 233 accumulated more radiation damage than crystal cores, indicating that rims are  
 234 enriched in actinides relative to cores. Alpha dose estimates for both AS3 and SAM-47  
 235 span above and below the estimated alpha dose threshold assigned to fission track  
 236 percolation  $1.9 \times 10^{18}$  α/g (Ketcham et al., 2013). This threshold also corresponds to key  
 237 transitions in zircon material properties including density (Holland and Gottfried, 1955;  
 238 Murakami et al., 1991; Ewing et al., 2003). Unannealed KR18-04 and BOM2A zircon  
 239 samples have low-to-intermediate levels of radiation damage and a lesser degree of  
 240 radiation damage zoning (Fig. 6a). Estimated alpha doses range from  $\sim 5 \times 10^{16}$  to  $7 \times 10^{17}$

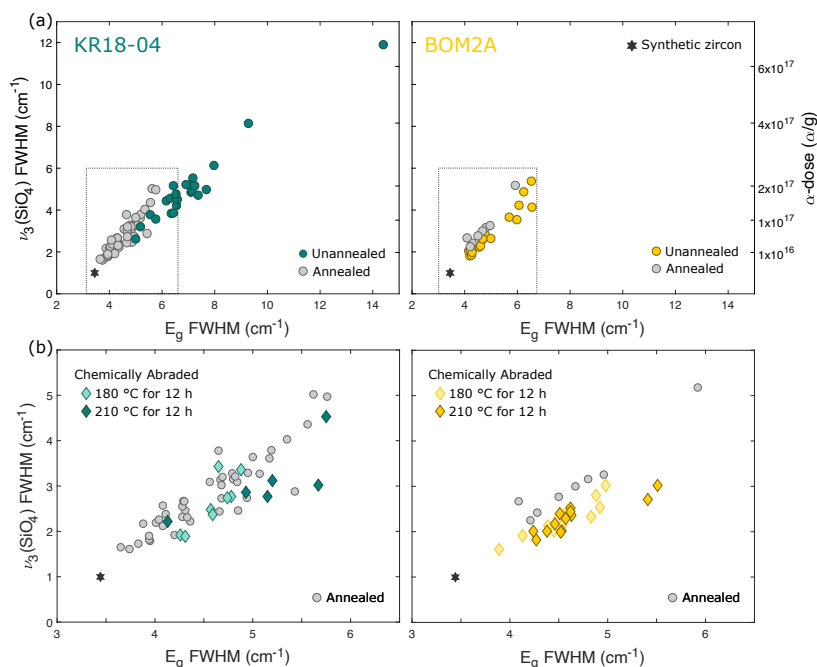

Figure 6: Raman  $\nu_3(\text{SiO}_4)$  and  $E_g$  peak width data for lower damage samples KR18-04 (left) and BOM2A (right). (a) Results for unannealed and annealed (900 °C for 48 h) zircon samples. Alpha dose estimates for unannealed zircon samples derived from  $\nu_3(\text{SiO}_4)$  peak width measurements are shown on the right y-axis (Váczi and Nasdala, 2017). Gray boxes mark the plot area presented in (b). (b) Results for annealed zircon samples and chemically abraded zircon residues.

241  $\alpha/\text{g}$  and  $\sim 6 \times 10^{15}$  to  $2 \times 10^{17}$   $\alpha/\text{g}$  for the two samples, respectively, well below the  $1.9 \times 10^{18}$   
242  $\alpha/\text{g}$  threshold.

243

244 Compared to their unannealed counterparts,  $\nu_3(\text{SiO}_4)$  and  $E_g$  peak widths in annealed  
245 AS3, SAM-47, and KR18-04 samples are narrower, consistent with the partial annealing  
246 of radiation damage (Fig. 5a and Fig. 6a) (Zhang et al., 2000; Geisler et al., 2002; Ginster  
247 et al., 2019; Härtel et al., 2021).  $\nu_3(\text{SiO}_4)$  and  $E_g$  peak width ranges for each sample have  
248 also narrowed, implying that annealing has decreased the magnitude of inter- and  
249 intra-crystalline variations in radiation damage. Annealing seems to have had minimal  
250 effect on the crystallinity of low-damage BOM2A. We note that none of the samples  
251 have achieved complete structural recovery after annealing at 900 °C for 48 h, since all  
252 measured peak widths are broader than that of synthetic zircon.

253

254 We note that relationship between the  $\nu_3(\text{SiO}_4)$  and  $E_g$  peak widths is steeper after  
255 annealing in each of the four samples, since the two Raman peaks have different  
256 temperature sensitivities (Härtel et al., 2021). This observation suggests that laboratory

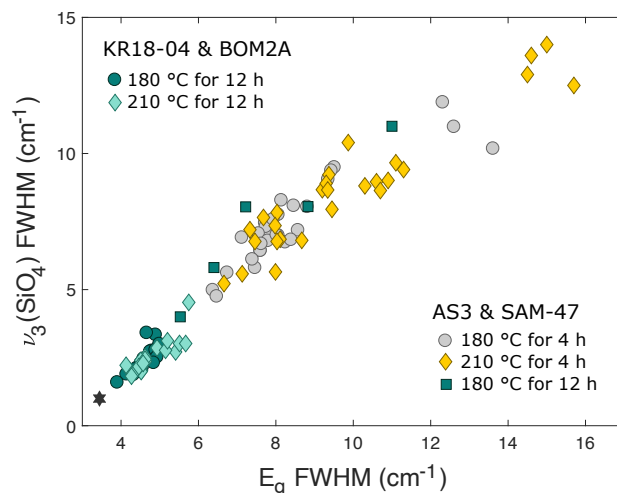

Figure 7: Raman  $\nu_3(\text{SiO}_4)$  and  $E_g$  peak width results for all chemically abraded zircon residues.

257 annealing is not simply the inverse of radiation damage accumulation. As such, we  
258 caution against using the Váczi and Nasdala (2017) calibration to derive alpha dose  
259 estimates from  $\nu_3(\text{SiO}_4)$  peak widths for annealed or chemically abraded samples and  
260 omit alpha dose axes from Figures 5b and 6b.

261

### 262 3.2.2 Chemically abraded zircon residues

263

264 Raman  $\nu_3(\text{SiO}_4)$  and  $E_g$  peak width measurements for chemically abraded zircon  
265 residues are shown in Fig. 5b and Fig. 6b. The broadest peaks for AS3, SAM-47, KR18-  
266 04, and BOM2A residues are narrower than that of their annealed but unleached  
267 counterparts. This pattern is most evident in the two higher damage samples, indicating  
268 that HF leaching has dissolved the most damaged zircon material in each sample. The  
269 two lower damage samples, however, each have only one annealed datapoint with a  
270 broader  $\nu_3(\text{SiO}_4)$  and  $E_g$  peak. We interpret this to suggest that small differences in  
271 radiation damage in crystals with low initial alpha doses does not have a significant  
272 impact on which portions of a grain dissolve.

273

274 Notably, SAM-47 and BOM2A residues each have at least one data point with a  
275 narrower  $\nu_3(\text{SiO}_4)$  and  $E_g$  peak width than their solely annealed counterparts suggesting  
276 that some residues have a higher degree of crystallinity. Further, we find that the  
277 residue datapoints for these two samples largely plot below (at lower  $\nu_3$  for a given  $E_g$ )  
278 the annealed datapoints indicating a change in the relationship between the  $\nu_3(\text{SiO}_4)$  and  
279  $E_g$  peaks. Taken together, these observations could suggest that additional structural  
280 recovery occurs in some zircon samples during HF leaching even after dry annealing at  
281 significantly higher temperatures.

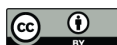

282

283 In Fig. 7 we compile Raman results for the four zircon samples to evaluate the effects of  
284 different partial dissolution conditions on the crystallinity of zircon residues. The  
285 spread in datapoints for AS3 residues leached at 180 °C for 12 h (all SAM-47 zircons  
286 disintegrated after 12 h) is shifted toward narrower values compared to AS3 and SAM-  
287 47 residues leached at either 180 °C or 210 °C for 4 h. This could imply that increasing  
288 the duration of the leaching step results in a more crystalline zircon residue due to the  
289 progressive dissolution of higher damage domains. We note, however, that only a small  
290 number of AS3 crystals survived 12 h of chemical abrasion, and only a small number of  
291 Raman analyses were made. We recommend further study to better evaluate this  
292 possibility. Somewhat surprisingly, we do not find leaching temperature to have a  
293 significant effect on the crystallinity of zircon residues; AS3 and SAM-47 samples  
294 leached for 4 h at 180 °C or 210 °C have residues with broadly similar peak width  
295 distributions, as do KR18-04 and BOM2A samples leached for 12 h at 180 °C or 210 °C.  
296 This could potentially reflect a small n-problem. We find that AS3 residues leached at  
297 180 °C for 12 h have universally broader peak widths compared to KR18-04 and  
298 BOM2A residues treated under the same leaching conditions. These results stress that a  
299 sample's initial radiation damage content profoundly affects the crystallinity of a  
300 sample's residue.

301

### 302 3.3 Imaging textures before and after partial dissolution

303

#### 304 3.3.1 AS3

305

306 The accumulation of radiation damage decreases the density of zircon by 17% from ~4.7  
307 to 3.9 g/cm<sup>3</sup> with the most rapid density change occurring over an alpha dose interval of  
308 ~1×10<sup>18</sup> to ~4×10<sup>18</sup> α/g (Holland and Gottfried, 1955; Murakami et al., 1991; Ewing et al.,  
309 2003; Nasdala et al., 2004). Raman data for unannealed AS3 grains indicates that these  
310 samples have alpha doses spanning above and below this interval. Lower density  
311 materials attenuate X-rays less, so metamict zones should appear darker in grayscale  
312 μCT image slices than crystalline zircon. Indeed, we find that some AS3 crystals exhibit  
313 density zoning (Fig. 8), indicating that annealing at 900 °C for 48 hr does not  
314 significantly increase zircon density in strongly metamict material. As evidenced by our  
315 SE images and discussed further below, μCT does not capture radiation damage zoning  
316 that does not result in a strong density contrast such as variations in radiation damage  
317 below the ~1×10<sup>18</sup> α/g threshold.

318

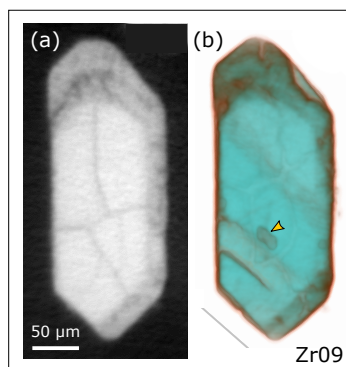

Figure 8:  $\mu$ CT images of a zircon with density zoning. (a) 2D  $\mu$ CT image slice of an annealed – but not leached – AS3 zircon crystal with a dark, low-density rim interpreted as metamict and a light, crystalline, and fractured core. (b) Semi-transparent 3D rendering of the  $\mu$ CT data for the same grain. High-density zircon is teal, and lower-density material is orange-brown. The arrow marks an interior inclusion. The faint stripes are surface indents of surficial inclusions not shown.

319 Images of annealed and chemically abraded AS3 grains are presented in Figures 9, 10,  
320 11, S1, and S2. Each figure shows results for one of the three leaching conditions – 180  
321 °C for 4 h, 210 °C for 4 h, and 180 °C for 12 h –, respectively. Here we briefly summarize  
322 key observations. We refer the reader to the figure captions for additional context.

323

324 Damaged zircon is intrinsically more soluble in HF than crystalline zircon.  $\mu$ CT images  
325 show that low-density metamict rims and interior zones are removed early in the  
326 leaching process at relatively low temperatures (180 °C for 4 h). SE images also  
327 document the removal of fine-scale compositional zones early in the leaching process.

328

329 Etching in SE images reflect the removal of soluble crystal defects including defects  
330 related to partially-annealed radiation damage, dislocations, low-angle grain  
331 boundaries, and intrinsic point defects. For spatial reference, fission tracks are  $\sim 16.7 \mu\text{m}$   
332 and alpha recoil tracks (clusters of alpha recoil tracks stemming from a single decay  
333 chain) average  $\sim 125 \text{ nm}$  in length prior to annealing (Ewing et al., 2003; Jonckheere,  
334 2003). In SE images, low damage compositional zones have smooth surfaces, whereas  
335 higher damage zones have pitted or sponge-like surfaces due to the etching of closely  
336 spaced radiation damage defects (Fig. 9c and Fig. 10aI). Etch pits and radiation damage  
337 zoning textures are not observed in  $\mu$ CT images due to the dataset's lower spatial  
338 resolution ( $1.62 \mu\text{m}$  voxels).

339

340 The geometric shape of individual etch pits on a grain's surface – such as the diamond  
341 or pyramid-like appearance of many pits – is independent of the nature of the defect  
342 (Jonckheere and Van den haute, 1996; Jonckheere et al., 2005; 2022). The pit's surface

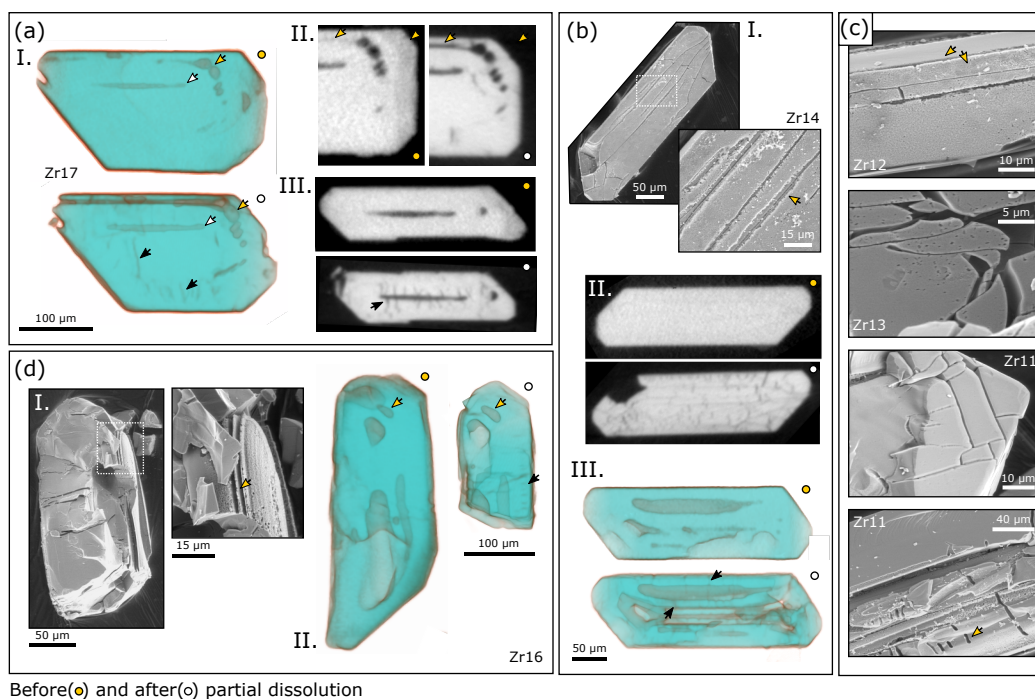

Before (○) and after (◦) partial dissolution

Figure 9: SE and  $\mu$ CT images of AS3 grains pre- and post-chemical abrasion (yellow dots and white dots, respectively) at 180 °C for 4 h. (a) I. Semi-transparent 3D renderings of  $\mu$ CT data for Zr17 showing melt inclusions removed by partial dissolution (yellow and white arrows) and newly visible fractures (black arrows). II. 2D  $\mu$ CT image slices showing the removal of a metamict rim and interior compositional zone. III. 2D  $\mu$ CT cross section of the melt inclusion marked by white arrows in I. Newly visible radial fractures have developed along the length of the melt inclusion (black arrow). (b) I. SE images of Zr14 showing the widening of fractures on the grain surface. II. 2D  $\mu$ CT image slices showing a fracture network after partial dissolution. III. 3D rendering of  $\mu$ CT data showing radial fractures (black arrows) around large melt inclusions removed by partial dissolution. (c) SE images of zircon residues illustrating the contrast between a smooth, low damage surface and a higher damage pitted surface (Zr12), curved acid paths and small etch pits (Zr13), blocky fractures (Zr11 top), and dumbbell-like dissolution features (Zr11 bottom). (d) I. SE images of Zr16 showing the removal of fine-scale compositional zones. II. 3D rendering of  $\mu$ CT data with showing the removal of large melt inclusions (yellow arrows), the formation of a parallel fracture sequence (black arrow), and significant volume loss likely due to breakage along the grain center where there are two giant melt inclusions.

343 symmetry instead reflects the mineral's crystallography. Zircon dissolution in HF is  
344 anisotropic, so the shape of etch pits also varies with crystallographic orientation  
345 (Gleadow et al., 1976; Yamada et al., 1995). As such, while individual diamond-shaped  
346 etch pits closely resemble SE images of etched fission tracks presented by others for  
347 zircon, apatite, monazite, and titanite (e.g., Jones et al., 2022), these could reflect other  
348 defect types such as lattice dislocations; if the surficial etch pit has overtaken the initial

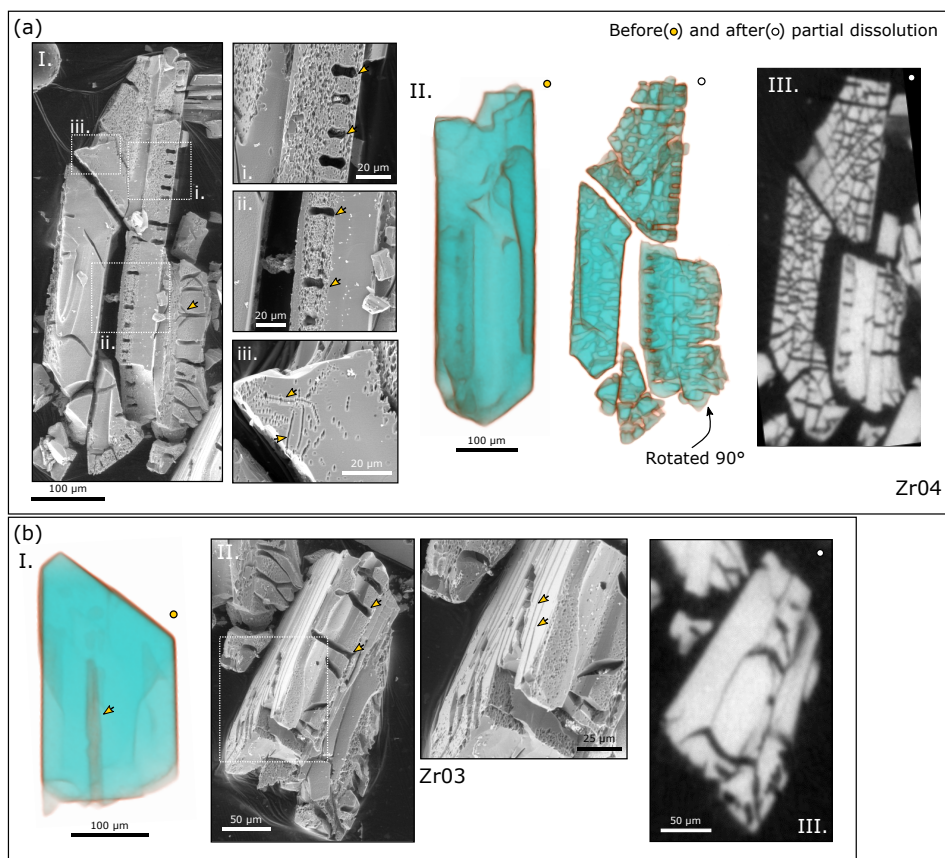

Figure 10: SE and  $\mu$ CT images of AS3 grains pre- and post-chemical abrasion at 210 °C for 4 h. (a) I. SE images of Zr04, a large crystal broken into four pieces. The rotated piece marked with a yellow arrow shows a ~~rice~~ cross-section of the grain interior. The arrow highlights an example of a branching channel. The higher magnification images show that these channels correlate with dumbbell features that cross-cut ~~compositional~~ zones of relatively low (i) or high (ii) radiation damage. iii shows etch pit arrays likely indicative of dislocations loops or low-angle grain boundaries. II. 3D rendering of the  $\mu$ CT data shows the development of a complex dissolution network in the crystal's interior. III. 2D  $\mu$ CT image slice showing that the intensive fracturing observed in 3D is restricted to narrow plane within the crystal. (b) I. Semi-transparent 3D rendering of  $\mu$ CT data for Zr03 showing a large melt inclusion. II. SE images show elongated, channel-like dumbbells (low magnification) and the apparent removal of fine-scale compositional zones (high magnification). III. 2D  $\mu$ CT image slice showing wide acid paths in the grain interior.

349 fission track channel beneath the surface it is impossible to tell. Most fission tracks  
 350 likely annealed during our pre-leach 900 °C annealing step (e.g., Yamada et al. 1995),  
 351 although some etch pits could reflect fission tracks that were pre-etched geologically  
 352 prior to chemical abrasion. Given the limited abundance, larger size, and spacing of the



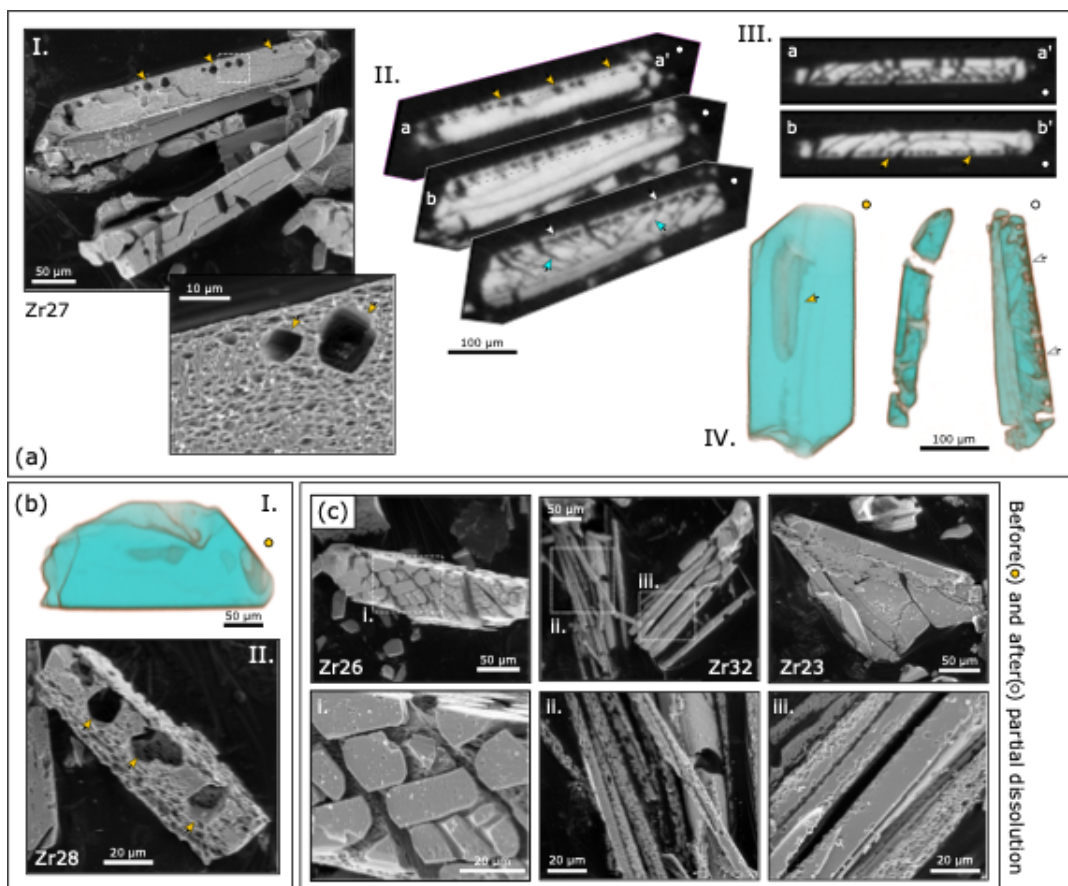

Figure 11. SE and  $\mu$ CT images of AS3 pre- and post-chemical abrasion at 180 °C for 12 h. (a) I. SE images of sample Zr27 showing a row of dumbbells along the length of the zircon crystal. The higher magnification SE image shows a sponge-like surface texture. II. A series of 2D  $\mu$ CT image slices progressively stepping down to view structures beneath the crystal's surface. The yellow arrows highlight the same dumbbell features marked on the SE image in I. The teal arrows highlight fractures, many of which radiate from dumbbell features. The white arrows mark another series of dumbbells on the bottom side of the crystal. III. Cross-sectional 2D  $\mu$ CT image slices of a-a' and b-b' as labeled in II. White arrows mark second set of dumbbells with a different crystallographic orientation. IV. Semi-transparent 3D rendering of  $\mu$ CT data with arrows highlighting a large melt inclusion. The dissolution of this inclusion likely caused the grain to break into two pieces. The white arrows mark the same row of dumbbells as indicated by the white arrows in II. (b) I. Semi-transparent 3D rendering of  $\mu$ CT data for Zr28 prior. II. SE image of the husk-like zircon shell with large dumbbell features. (c) SE images of zircon residues Zr26, Zr32, and Zr23 showing cobble stone, straw, and lace-like textures.

353 diamond and pyramid-like etch pits, we find them unlikely to reflect etching of  
 354 partially annealed-alpha recoil tracks. We interpret etch pit arrays that do not correlate



355 with expected compositional zoning patterns (Fig. 10a-iii) to reflect the dissolution of  
356 dislocation loops or low-angle grain boundaries.

357

358 Etch textures are more subtle at low temperatures and short leaching durations. At  
359 hotter temperatures and longer leaching durations, etched zones have deeper, sponge-  
360 like textures indicative of a greater degree of dissolution. At a full 12 h leach, ~~only~~ a  
361 heavily dissected crystalline husk, a collection of perforated straw-like zones, or a  
362 cobble stone-like residue is sometimes all that remains.

363

364 ~~Geometrical~~ dissolution features ~~that cross-cut compositional zones~~ as highlighted in  
365 Fig. 10a and Fig. 11a and hereafter referred to as dumbbells, are a common feature in  
366 AS3 zircon residues. Some dumbbells cross-cut zones of relatively high radiation  
367 damage, while others cross-cut zones of relatively low radiation damage. All observed  
368 dumbbells are oriented parallel to the grain's *c*-axis. 3D rendering of  $\mu$ CT data reveal  
369 that dumbbells are surface expressions of complex, fracture networks restricted to  
370 specific ~~compositional~~ zones. The ~~geometrical~~ shape of dumbbells and the branching,  
371 channel-like appearance of some fractures in SE imaging, indicate that these fracture  
372 networks are focal points for crystallographically-controlled dissolution. Aside from  
373 dumbbells, we note that fractures ~~in general~~ are a common feature in both SE and  $\mu$ CT  
374 images of leached grains.

375

376 ~~Excitingly~~, our  $\mu$ CT dataset also generates new insights into the fate of inclusions  
377 hosted deep within grain ~~interiors~~. In  $\mu$ CT image slices, inclusions appear dark with  
378 grayscale intensities marginally above that of background (air and tape) due to their  
379 low density and mean atomic number relative to that of zircon. We interpret an  
380 inclusion to have been removed if: 1) its gray-scale intensity decreases to that of  
381 background, 2) there is a change ~~to its~~ size or morphology after leaching, or 3) there is a  
382 clear acid path to the inclusion. We find that the majority of inclusions in AS3 appear to  
383 dissolve at short leaching durations. Around the largest inclusions, we observe radial  
384 fractures in  $\mu$ CT images of leached grains that are not apparent ~~in the before imagery~~  
385 ~~dataset~~.

386

### 387 3.3.2 SAM-47

388

389 Images of annealed and chemically abraded SAM-47 grains treated at 180 °C or 210 °C  
390 for 4 h are presented in Figures 12, 13, S3, and S4. Like AS3, several annealed SAM-47  
391 crystals have density zoning in  $\mu$ CT. In most cases density zoning is in the form of  
392 metamict rims, however, we note ~~that one crystal was seen~~ with oscillatory density  
393 zoning. This finding is consistent with our Raman data which shows that unannealed  
394 SAM-47 samples have alpha doses that span the interval over which density changes

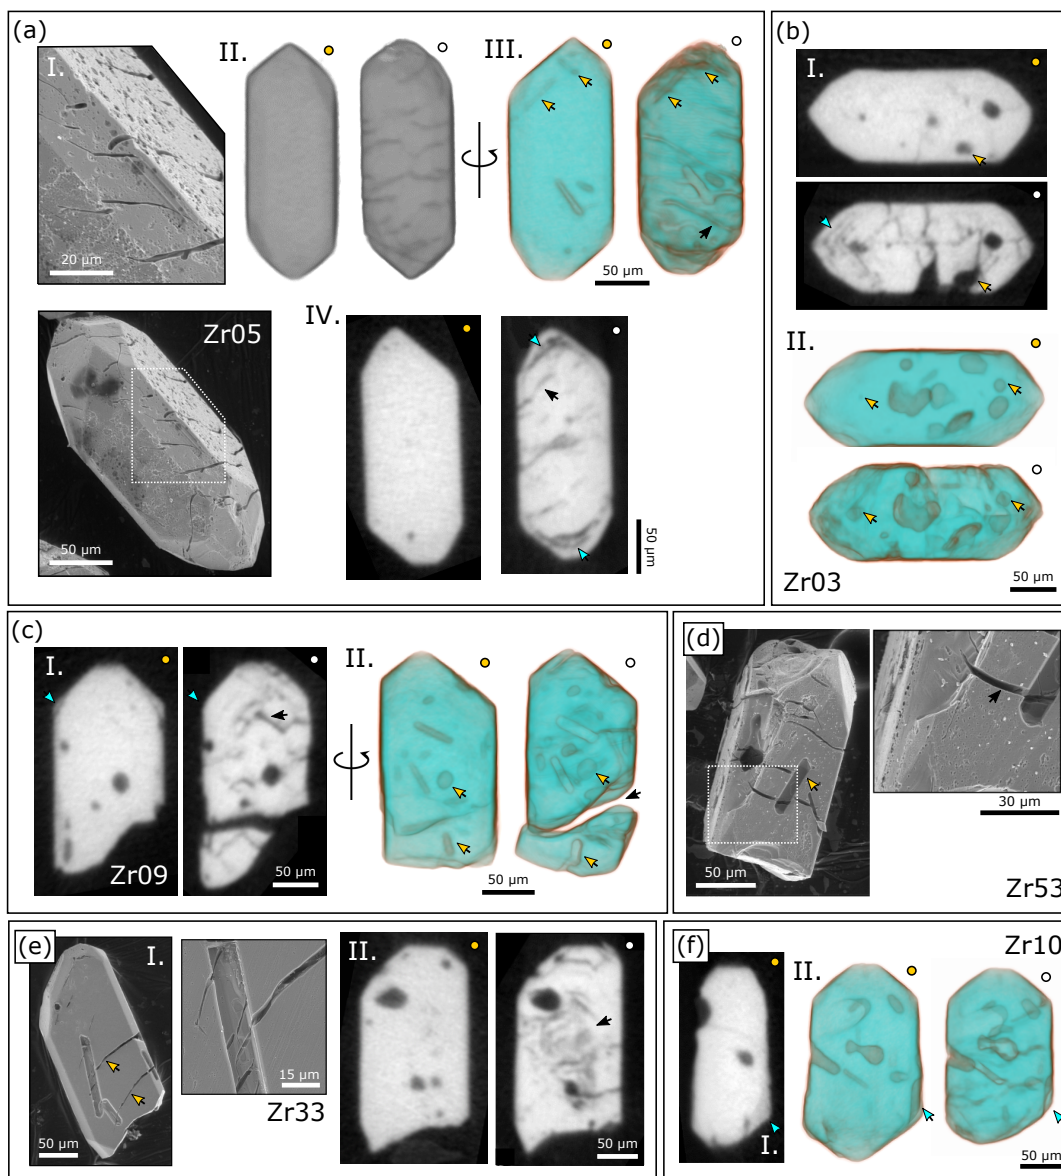

Before (●) and after (○) partial dissolution

395 rapidly occur (Holland and Gottfried, 1955; Murakami et al., 1991; Ewing et al., 2003;  
 396 Nasdala et al., 2004). Like AS3, we find that low density rims and interior zones are  
 397 removed by chemical abrasion at low leaching temperatures and duration (180 °C, 4 h).  
 398  
 399 SE images of SAM-47 residues treated at 180 °C for 4 h show a range in surface textures  
 400 (Fig. 12). Some grains have smooth, unetched surfaces while others are more strongly  
 401 etched. These variations likely reflecting inter-crystalline variations in radiation



Figure 12: SE and  $\mu$ CT images of SAM-47 grains pre- and post-chemical abrasion at 180 °C for 4 h. (a) I. SE images of Zr05 showing deep grooves on the grain's surface and a sponge-like etch texture. II. Opaque 3D rendering of  $\mu$ CT data showing that these surface fractures are only apparent after partial dissolution. III. Semi-transparent 3D rendering of  $\mu$ CT data with yellow arrows marking inclusions removed by partial dissolution. IV. 2D  $\mu$ CT image slices highlighting an example of an acid path into the grain interior (black arrow) and the removal of ~~oscillatory compositional~~ zones (teal arrow). (b) I. 2D  $\mu$ CT image slices showing the removal of fine-scale oscillatory ~~compositional~~ zones (teal arrow) and a mineral inclusion (yellow arrows) in Zr03. II. Semi-transparent 3D rendering of  $\mu$ CT data with yellow arrows depicting the removal of more mineral inclusions. (c) I. 2D  $\mu$ CT image slices of Zr09 showing the removal of a low-density rim (teal arrow) and an acid path into the grain interior (black arrow). II. Semi-transparent 3D rendering of  $\mu$ CT data highlighting the removal of inclusions (yellow arrows) and the formation of a large fracture (black arrow). (d) SE images of Zr53 showing crystal-shaped voids interpreted as dissolved surface-reaching inclusions (yellow arrow) and the fractures that crosscut these voids (black arrow). (e) SE images of Zr33 ~~again~~ showing fractures cross-cutting inclusions removed by partial dissolution (yellow arrows) and a smooth grain surface. II. 2D  $\mu$ CT image slices showing a convolute pattern of material dissolved from the crystal core. (f) I. 2D  $\mu$ CT image slices highlighting a low-density rim on Zr10. II. Semi-transparent 3D rendering of  $\mu$ CT data showing the removal of this rim.

402 damage. Large prismatic voids on grain surfaces indicate that low-intensity chemical  
403 abrasion removes surface-reaching inclusions. Most prismatic voids are crosscut by  
404 large fractures, while other grains have finer sinuous fracture patterns not associated  
405 with surface-reaching inclusions.  $\mu$ CT imaging shows that many most zircon residues  
406 treated at 180 °C for 4 h have fractures or acid paths to grain interiors that were not  
407 visible in the pre-etching image data. These paths ~~have allowed for~~ the dissolution of  
408 inclusions, fine-scale oscillatory zones, and convolute zones from crystal interiors.

409  
410 SE images of SAM-47 residues treated at 210 °C for 4 h have deeper, sponge-like etching  
411 textures (Fig. 13). Many grains look **dog-chewed**. Etch pits are larger with diamond-like  
412 shapes similar to those observed in AS3 crystals treated at either 210 °C for 4 h or 180 °C  
413 for 12 h, and fractures are commonly wider. SE images again show the removal of  
414 surface-reaching inclusions, and the shell-like appearance of some residues hints at the  
415 removal of interior zones.  $\mu$ CT images of residues treated at 210 °C for 4 h reveal  
416 significant dissolution in grain interiors. Oscillatory ~~compositional~~ zones and inclusions  
417 have been removed from deep within crystal cores. Acid paths are in general wider and  
418 more interconnected, and fractures crosscut where mineral inclusions once were. We  
419 also observe fracture patterns similar to the dumbbells observed in AS3 residues. **In a**  
420 **visual game of connect-the-dots** in a  $\mu$ CT image slice of Zr30 (Fig. 13a-II), dumbbell-like  
421 features appear to crosscut what is likely a continuous, oscillatory ~~compositional~~ zone.  
422 Other fractures appear to radiate from the dumbbell features. We see dumbbell-like  
423 fracture patterns again in sample Zr36 (Fig. 13b-III) where crosscutting fractures

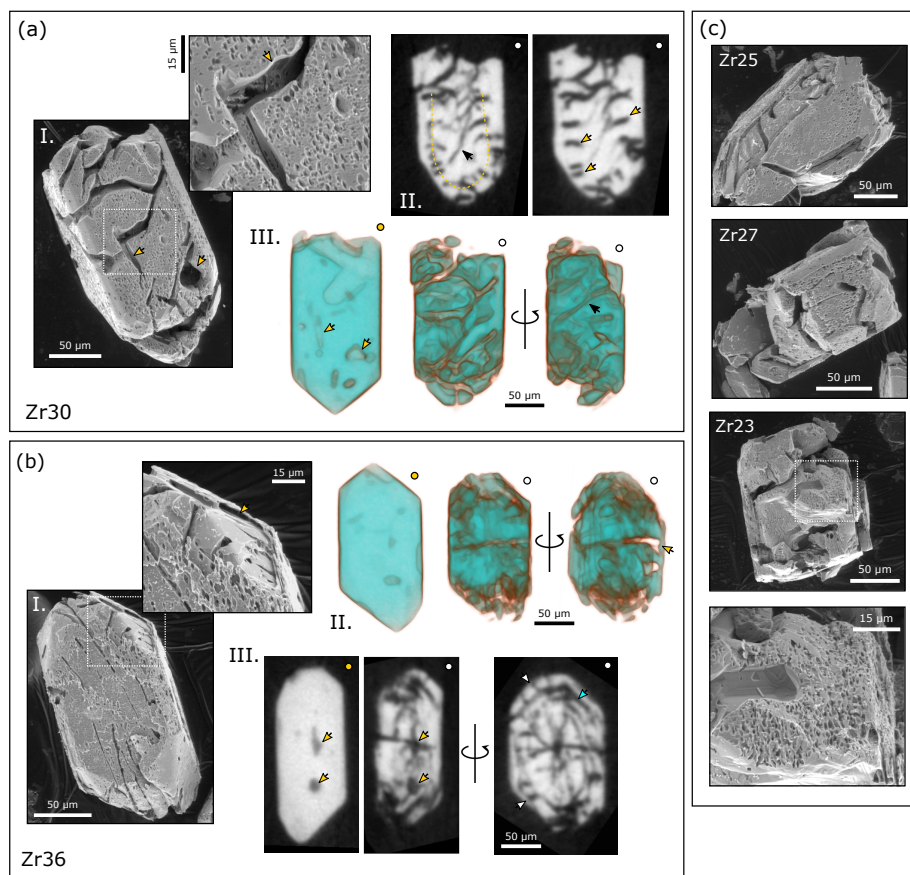

Before(o) and after(o) partial dissolution

Figure 13: SE and  $\mu$ CT images of SAM-47 grains pre- and post-chemical abrasion at 210 °C for 4 h. **(a)** I. SE images of Zr30 showing wide fractures, the removal of mineral inclusions (yellow arrows), and a moderately etched surface. II. 2D  $\mu$ CT image slices highlighting dumbbell-like features (yellow arrows) interpreted to cross-cut what could be a concentric **compositional zone** (yellow dashed line). The black arrow exhibits how fractures radiate from the dumbbell features. III. Semi-transparent 3D rendering of  $\mu$ CT data. Yellow arrows correlate to those in I. The black arrow highlights how the fractures observed on the surface propagate through the crystal interior. **(b)** I. SE images of Zr36 showing fractures, diamond-shaped etch pits, and the targeted removal of **a compositional zone** (yellow arrow). II. Semi-transparent 3D rendering of  $\mu$ CT data. **The yellow arrow highlights the grain's shell-like appearance because of significant dissolution in the grain's interior.** III. 2D  $\mu$ CT image slices showing the removal of mineral inclusions (yellow arrows), oscillatory zones (teal arrow), and dumbbell-like fractures that appear to cross-cut compositional zones (white arrows). **(c)** SE images of **dog-chewed zircon residues** Zr25, Zr27, and Zr23.

424 connect different oscillatory zones removed by dissolution to one another and to the  
 425 grain surface.  
 426  
 427

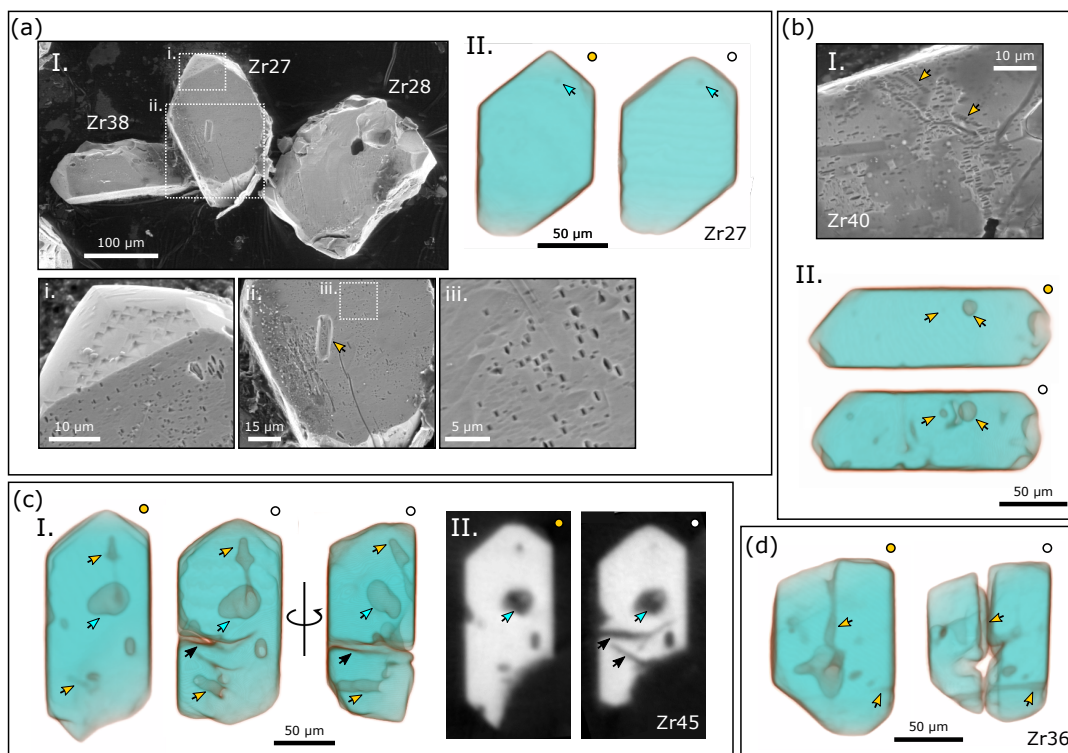

Before (o) and after (●) partial dissolution

Figure 14: SE and  $\mu$ CT images of KR18-04 grains pre- and post-chemical abrasion at 180 °C for 12 h. (a) I. A low magnification SE image of zircon samples Zr38, Zr27, and Zr28 and higher magnification images of Zr27 showing close up images of rectangular and triangular etch pits and the removal of a surface-reaching inclusion (yellow arrow). II. Semi-transparent 3D rendering of  $\mu$ CT data for Zr27. Arrows highlight an inclusion inferred to have survived partial dissolution. (b) I. SE image of Zr40 with linear etch pit arrays likely indicative of dislocations. II. Semi-transparent 3D rendering of  $\mu$ CT data highlighting inclusions that dissolved. (c) I. Semi-transparent 3D rendering of  $\mu$ CT data for Zr45. Teal arrows highlight a large inclusion inferred to have survived partial dissolution, while yellow arrows mark inclusions that dissolved. Black arrows mark acid paths. II. 2D  $\mu$ CT image slices. Teal arrows mark the same multi-phase inclusion in I. Black arrows mark acid paths ~~not apparent in the before imagery dataset~~. (d) Semi-transparent 3D rendering of  $\mu$ CT data for Zr36. Yellow arrows highlight surface-reaching inclusions removed by partial dissolution, resulting in a large cavity in the grain's interior.

428

### 429 3.3.3 KR18-04

430

431 Images of annealed and chemically abraded KR18-04 grains treated at 180 °C or 210 °C  
 432 for 12 h are presented in Fig. 14 and Fig. 15, respectively. SE images of residues treated  
 433 at 180 °C show intact-grains with mildly etched surfaces (Fig. 14). Etch pits on (100) are  
 434 small, prismatic, and generally rectangular, while etch pits on other crystal faces are  
 435 more triangular, highlighting that the shape of etch pits are crystallographically

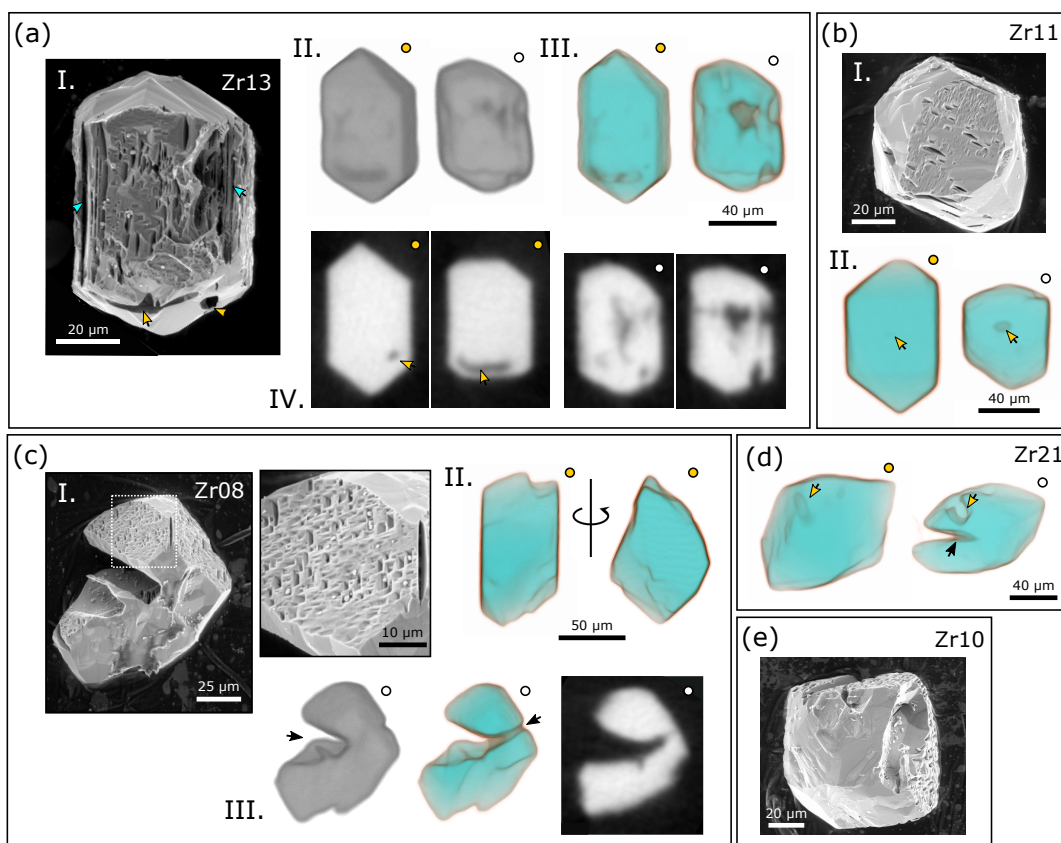

Before(○) and after(○) partial dissolution

Figure 15: SE and  $\mu$ CT images of KR18-04 grains pre- and post-chemical abrasion at 210 °C for 12 h. **(a)** I. SE image of Zr13 showing dissolved inclusions (yellow arrows) and the removal of oscillatory zones (teal arrows). II. Opaque 3D rendering of  $\mu$ CT data. III. Semi-transparent 3D rendering of  $\mu$ CT data. IV. Representative 2D  $\mu$ CT image slices indicate that a significant amount of zircon material was dissolved from the grain's interior. Yellow arrows correlate to those in I. **(b)** I. SE image of Zr11 showing deep etch pits on (100) with the long axes oriented parallel to the crystal's *c*-axis. Etch pits are absent from other crystal faces. II. Semi-transparent 3D rendering of  $\mu$ CT data showing a dissolved inclusion. **(c)** I. SE images of Zr08. High magnification image shows closely spaced and overlapping prismatic etch pits that form a sponge-like texture. II. Semi-transparent 3D rendering of  $\mu$ CT data acquired before partial dissolution. III. Opaque and Semi-transparent  $\mu$ CT 3D renderings and a representative 2D  $\mu$ CT image slice of the sample after partial dissolution. Black arrows highlight acid paths into the grain interior. **(d)** Semi-transparent 3D rendering of  $\mu$ CT data for Zr21. Yellow arrows mark an inclusion that dissolved. The black arrow highlights the acid path that inexplicably cut into the grain interior. **(e)** SE image of Zr10 with deep prismatic etch pits present on some grain surfaces but not others.

436 controlled. Linear etch pit arrays suggest the dissolution of defects related to dislocation  
 437 loops.



438

439 Large crystal-shaped voids on grain surfaces indicate that surface-reaching inclusions  
440 are removed by chemical abrasion.  $\mu$ CT images of residues treated at 180 °C indicate  
441 that partial dissolution removes some – but not all – mineral inclusions from crystal  
442 interiors. For example, the large multi-phase inclusion in Fig. 14c-I is interpreted to  
443 have survived partial dissolution since 1) there is apparent change to the grayscale  
444 intensities of either phase relative to that of background, 2) there is no apparent change  
445 to the inclusion's size or morphology, and 3) there is no evidence that an acid path has  
446 reached the inclusion. ~~We note that beam-hardening effects make it challenging to~~  
447 ~~identify whether or not smaller inclusions have survived chemical abrasion. In such~~  
448 ~~cases, grayscale intensity values cannot be used to identify whether or not an inclusion~~  
449 ~~has been removed.~~

450

451 We note that some residues have fractures or acid paths that lack obvious precursors in  
452 the before imagery dataset. Qualitatively, before-and-after  $\mu$ CT imagery suggest  
453 minimal volume loss and a slight shortening of prismatic grain's c-to-a aspect ratio.

454

455 SE images of residues treated at 210 °C show the removal of fine-scale oscillatory zones  
456 and surface-reaching inclusions. Etch pits are well-preserved on some crystal faces  
457 including (100) and entirely absent on others. Etch pits are generally larger than those  
458 observed in 180 °C residues. Many are deep, rectangular, and well-faceted. The long  
459 axes of deep rectangular pits align parallel to the crystallographic *c*-axis, while the long  
460 axes of shallower rectangular pits align parallel to the *a*-axis. Etch pit clusters have a  
461 sponge-like texture.  $\mu$ CT images of residues treated at 210 °C show that inclusions and  
462 zircon material have been dissolved from grain interiors. Some grains have deep  
463 ~~carveouts from~~ crystal interiors with no obvious structural precursor in the before  
464 imagery dataset. Before-and-after imagery suggest higher volume loss and a  
465 pronounced shortening of some grains' aspect ratio.

466

#### 467 3.3.4 BOM2A

468

469 Images of annealed and chemically abraded BOM2A grains treated at 180 °C or 210 °C  
470 for 12 h are presented in Fig. 16 and Fig. 17, respectively. ~~SE images of~~ residues treated  
471 at 180 °C are largely intact (Fig. 16). Similar to KR18-04 residues leached under the same  
472 conditions, etch pits are small and rectangular. Some etch pits are isolated while others  
473 are interconnected. Some surfaces have deep voids that penetrate the grain ~~interior~~ but  
474 do not correlate with inclusions.  $\mu$ CT images qualitatively suggest minor volume loss  
475 with a slight shortening along a crystal's *c*-axis. Chemical abrasion appears to dissolve  
476 surface-reaching inclusions and some – but not all – inclusions from crystal interiors.  
477 Some residues have fractures that are spatially associated with inclusions.





478

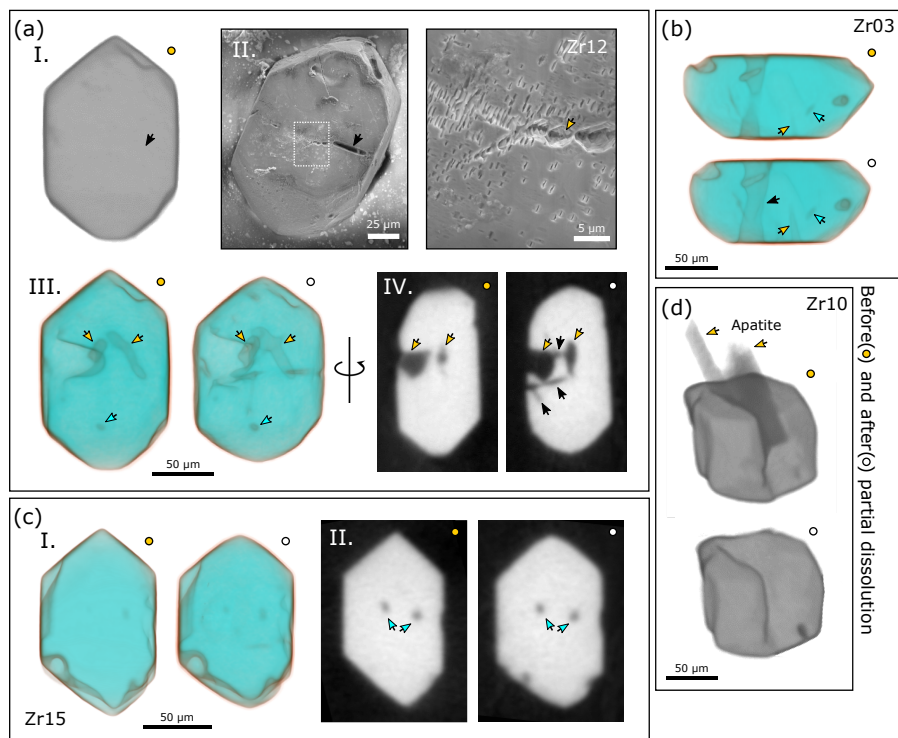

Figure 16. SE and  $\mu$ CT images of BOM2A grains pre- and post-chemical abrasion at 180 °C for 12 h. **(a)** I. Opaque 3D rendering of  $\mu$ CT data for Zr12. II. SE image of grain surface with close up image of clustered and isolated rectangular etch pits. The black arrow points to a void in the crystal perhaps related to a surficial inclusion not apparent in the pre-chemical abrasion dataset, and the yellow arrow highlights another interesting dissolution feature. III. Semi-transparent 3D rendering of  $\mu$ CT data showing inclusions removed by partial dissolution (yellow arrows) and inclusions inferred to have survived (teal arrows). IV. 2D  $\mu$ CT image slices with yellow arrows depicting inclusions dissolved during chemical abrasion and black arrows highlighting acid paths. **(b)** Semi-transparent 3D rendering of  $\mu$ CT data for Zr03 showing inclusions removed by partial dissolution (yellow arrows) and inclusions inferred to have survived (teal arrows). The black arrow highlights an acid path cutting through the crystal interior. **(c)** I. Semi-transparent 3D rendering of  $\mu$ CT data for Zr15 suggesting a slight shortening along the  $c$ -axis. II. 2D  $\mu$ CT image slices showing inclusions inferred to have survived partial dissolution. **(d)** Opaque 3D rendering of  $\mu$ CT data for Zr10 showing the removal of large, protruding apatite inclusions by partial dissolution.

479 SE images of residues treated at 210 °C show etch pits **are** preserved on some crystal  
 480 faces but not others suggesting a crystallographic control on etch pit formation or  
 481 preservation (Fig. 16). Like KR18-04 residues leached under the same conditions, etch  
 482 pits are larger with well-developed facets. Some are isolated **with** others interconnect to  
 483 form acid paths into grain interiors. The long axes of deep, **octahedral** etch pits on (100)  
 484 align with the crystal's  $c$ -axis, while the long axes of shallower etch pits that form  
 485 perpendicular to the octahedral ones align with the crystal's  $a$ -axis. Some SE images

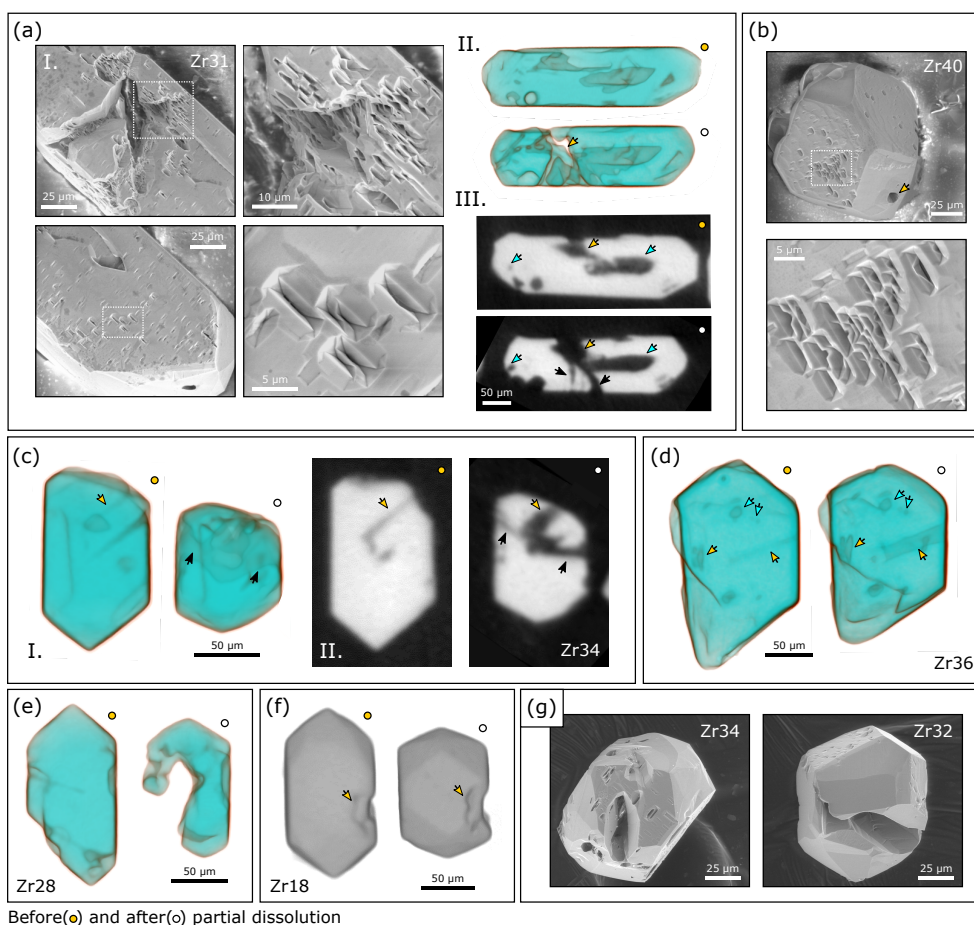

Figure 17: SE and  $\mu$ CT images of BOM2A grains pre- and post-chemical abrasion at 210 °C for 12 h. **(a)** I. SE images of Zr31 showing deep fractures penetrating the grain's interior. Close up images show well-faceted etch pits on (100) some of which are isolated while others are interconnected. The long axes of deep, octahedral etch pits are oriented parallel to the  $c$ -axis, whereas the long axes of shallower etch pits are oriented parallel to the  $a$ -axis. II. Semi-transparent 3D rendering of  $\mu$ CT data again highlighting the development of large fractures. III. 2D  $\mu$ CT image slices. Teal arrows highlight inclusions that were dissolved, the yellow arrow points to a surface-reaching inclusion that acted as an acid path into the grain interior, and the black arrow highlights acid paths not observed in the before imagery dataset. **(b)** SE images of Zr40 that demonstrates how some crystallographic faces are strongly etched while others are pristine. Etch pits are again strongly prismatic and sometimes interconnected. The yellow arrow points to a void where there once was an inclusion. **(c)** I. Semi-transparent 3D rendering of  $\mu$ CT data for Zr34 showing a significant shortening of the crystal's  $c$ -axis. II. 2D  $\mu$ CT image slices. The yellow arrows highlight surface-reaching inclusions removed by partial dissolution. Black arrows mark acid paths not apparent in the before imagery dataset. **(d)** Semi-transparent 3D rendering of  $\mu$ CT data for Zr36. Teal arrows highlight inclusions inferred to have survived partial dissolution. Yellow arrows highlight inclusions that were dissolved. **(e)** Semi-transparent 3D rendering of  $\mu$ CT data for Zr28 showing significant volume loss from the grain interior. **(f)** Opaque 3D rendering of  $\mu$ CT data for Zr18. Yellow arrows highlight how some topographic features are preserved during partial dissolution despite significant volume loss. Note how crystal facets are better developed after partial dissolution. **(g)** Low magnification SE images of Zr34 and Zr32 showcasing the crystallographic-dependence of surface etching and acid paths that cut deep into grain interiors.

486 show that acid has penetrated deeply into grain interiors forming what look like



487 caverns. Many of these caverns lack precursors in pre-etching images.  $\mu$ CT images  
488 show that the dissolution of surface-reaching inclusions commonly allows acid into  
489 crystal cores. We find that some of the fractures observed in SE images are spatially  
490 associated with large mineral inclusions. Like the 180 °C leach, we find that leaching at  
491 210 °C removes some – but not all – interior inclusions. Qualitatively, volume loss  
492 appears greater at 210 °C, and the *c*-axis is considerably shorter in most crystals after  
493 partial dissolution. Before-and-after images show that some topographic features are  
494 preserved during chemical abrasion. We also find that some residues are more strongly  
495 faceted than they were prior to chemical abrasion.

496

### 497 3.4 Quantifying volume loss and changes to crystal morphology

498

499 All quantitative measurements made using the ruler and segmentation functions in  
500 Dragonfly ORS software for samples KR18-04 and BOM2A are presented in  
501 supplementary Tables S2 and S3 and summarized in Fig. 18. We find that leaching at  
502 180 °C for 12 h causes a ~5 to 10 % decrease in the length of a crystal's *c*-axis (Fig. 18a).  
503 Increasing the leaching temperature to 210 °C results in a greater degree of shortening  
504 on the order of ~15 to 30 %. In contrast, the length of a crystal's *a*-axes shows little  
505 (maximum <4 %) to no change after leaching at 180 °C or 210 °C (Fig. 18b).  
506 Consequently, the aspect ratio (*c/a*) of a crystal decreases during chemical abrasion (Fig.  
507 18c). Note, a 2 % change in a crystal with an initial axis length of 80  $\mu$ m equates to a  
508 change of 1.6  $\mu$ m which is approximately the spatial resolution of our  $\mu$ CT dataset (1.62  
509  $\mu$ m). As such we take ~2 % to be a minimum estimate for our measurement error.

510

511 Estimated volume losses are presented in Fig. 18d. Our SE images clearly indicate that  
512 the spatial resolution of our  $\mu$ CT dataset does not adequately capture fine-scale  
513 dissolution features. As such, we consider our volume estimates based on grayscale  
514 segmentation to reflect first-order approximations for minimum volume loss. We find  
515 that chemical abrasion at 180 °C for 12 h dissolves ~5 to 10 % of a grain by volume,  
516 whereas chemical abrasion at 210 °C for 12 h dissolves ~25 to 50 % of a grain by volume.  
517 Although there is considerable overlap between the BOM2A and KR18-04 datasets at  
518 both leaching conditions, KR18-04 values are skewed toward a greater degree of  
519 volume loss than BOM2A. This is likely due to the impact of radiation damage on  
520 zircon solubility; unannealed KR18-04 grains on average have higher initial alpha doses  
521 than unannealed BOM2A grains.

522

523 Fig. 18e suggests that there may be a weak correlation in which crystals with aspect  
524 ratio's <2.5 dissolve more readily than crystals with aspect ratio >2.5 amongst samples  
525 leached at 210 °C. This reflects the fact that crystals with lower aspect ratios have a  
526 higher proportion of faster dissolving surfaces. The fact that this correlation is so weak,

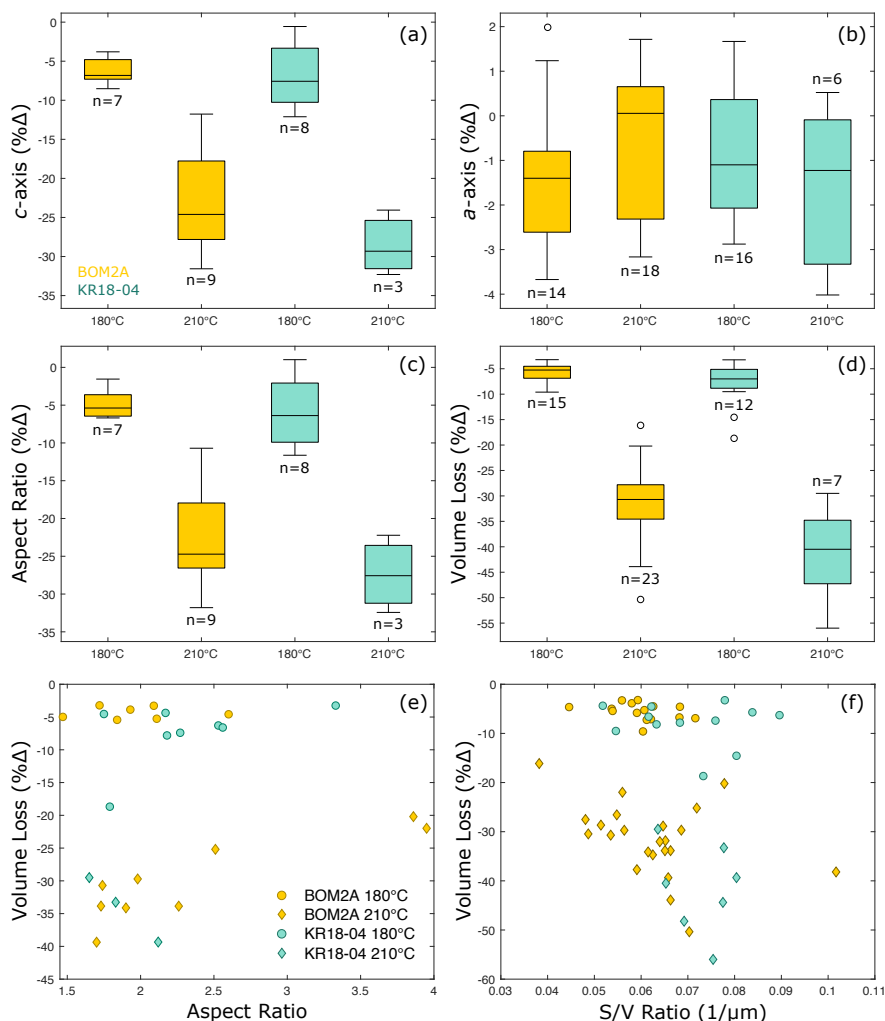

Figure 18: Data plots summarizing crystal morphology, volume, and surface area measurements for KR18-04 and BOM2A. **(a)** Boxplot showing how the length of a grain's *c*-axis changes during chemical abrasion. In all box plots, the central line represents the dataset's median, the box extends to the dataset's 25<sup>th</sup> and 75<sup>th</sup> percentiles, the whiskers extend to include the full data range excluding outliers, and circles markers are outliers that exceed the 99% confidence interval. **(b)** Boxplot showing how the length of a grain's *a*-axis changes during chemical abrasion. **(c)** Boxplot showing how a grain's aspect ratio (*c/a*) changes during chemical abrasion. **(d)** Boxplot showing estimated volume loss during chemical abrasion. **(e)** Scatter plot showing the relationship between a grain's initial aspect ratio and estimated volume loss. **(f)** Scatter plot showing the relationship between a grain's initial surface-to-volume ratio and estimated volume loss.



528 however, likely indicates that a crystal's bulk radiation damage has a greater control on  
529 dissolution than its aspect ratio. The data in this figure, however, clearly stresses that  
530 leaching temperature ultimately has more control than aspect ratio on the rate of zircon  
531 dissolution. There is also not a clear correlation between a grain's initial surface area-to-  
532 volume ratio and volume loss (Fig 18f).

533

## 534 4 Discussion

535

### 536 4.1 The Mechanics of Zircon Dissolution

537

#### 538 4.1.1 Higher damage grains

539

540 Except for low-density metamict rims that are removed by low-intensity chemical  
541 abrasion (180 °C for 4 h), we find that AS3 and SAM-47 samples – which have initial  
542 alpha doses between  $\sim 2 \times 10^{17} \alpha/g$  to  $> 1 \times 10^{19} \alpha/g$  – do not predominantly dissolve from  
543 rim-to-core. Instead, our results suggest that acid often reaches and dissolves material  
544 from grain interiors including inclusions and soluble oscillatory compositional zones  
545 with higher degrees of radiation damage (Fig. 9 – Fig. 13) leaving behind a more  
546 crystalline zircon residue free of inclusions (Fig. 5).

547

548 In higher damage grains, fractures play a fundamental role in zircon dissolution by  
549 providing acid access to crystal interiors. While fractures are common in CL and BSE  
550 images of annealed AS3 and SAM-47 grains, fractures are rare in  $\mu$ CT images of  
551 annealed grains. We attribute the apparent discrepancy between our SEM and  $\mu$ CT  
552 dataset to the difference in spatial resolution between the two imaging methods.  
553 Fractures are likely visible in  $\mu$ CT zircon residues because dissolution has widened  
554 them beyond the dataset's 1.62  $\mu$ m spatial resolution (Fig. 9b-I).

555

556 We find that many fractures observed in SE and  $\mu$ CT images of zircon residues are  
557 spatially associated with radiation damage zoning (Fig. 10a, Fig. 11a-b, and Fig. 13b).  
558 Radial or concentric fracturing related to internal stresses caused by volume expansion  
559 of radiation-damaged domains is a common feature in zircon (Chakoumakos et al.,  
560 1987; Lee and Tromp, 1995). Fracturing has also been attributed to internal stresses  
561 caused by volume reduction due to radiation damage annealing (Geisler et al. 2001a,  
562 Geisler et al. 2002). CL images of annealed AS3 samples demonstrate that fractures  
563 associated with radiation damage zoning are often present prior to partial dissolution in  
564 HF acid (Fig. 3a-I, a-II, and a-III). Some of the fractures observed in CL images of AS3  
565 grains show evidence of hydrothermal alteration indicating that they are geological in  
566 nature (Fig. 3a-I). We consider it likely, however, that some fractures developed during  
567 dry annealing at 900 °C for 48 h or perhaps even during hydrothermal annealing in HF



568 (Geisler et al., 2001b; Geisler et al., 2002). Dual radiation damage accumulation and  
569 annealing-~~fracturing~~ mechanisms best explain why some fractures in zircon residues  
570 crosscut zones of relatively high radiation damage while others crosscut zones of  
571 relatively low radiation damage (Fig. 10a). Radiation damage zoning fracturing  
572 mechanisms also explain why complex fracture networks tend to develop within certain  
573 ~~compositional~~ zones (Fig. 10a, Fig. 11a).

574

575 Fractures are also commonly associated with inclusions. We observe radial fractures  
576 around melt inclusions in  $\mu$ CT images of AS3 residues (Fig. 9a-b) and fractures that  
577 crosscut mineral inclusions in SE and  $\mu$ CT images of SAM-47 residues (Fig. 12d-e).  
578 Similar fractures are also observed in BSE images of annealed SAM-47 grains (Fig. 3b).  
579 BSE images of unannealed SAM-47 grains confirm that some of these fractures formed  
580 prior to the start of the experiment. We hypothesize, however, that some fractures likely  
581 developed during laboratory annealing at 900 °C for 48 h, since zircon and inclusions  
582 have different material properties such as coefficients of thermal expansion (e.g.,  
583 Subbarao et al., 1990; Hovis et al., 2015). Stress fractures around inclusions have long  
584 been used to identify heat treatment in gemstones (Crowningshield and Nassau, 1981;  
585 Nassau 1981).

586

587 While fractures related to radiation damage zoning and inclusions are the major  
588 highways providing acid access to crystal interiors, SE images of overlapping etch pits  
589 indicate that acid also percolates across regions with high defect densities including  
590 zones of higher radiation damage (Fig. 10a, Fig. 11) and regions with dislocation loops  
591 (Fig. 10a-iii). Increasing the temperature or duration of acid leaching results in more  
592 pronounced and interconnected etching textures on grain surfaces, wider acid paths,  
593 and the formation of more complex dissolution networks deep within crystal interiors.

594

#### 595 **4.1.2 Lower damage grains**

596

597 The mechanics of zircon dissolution are considerably different for samples KR18-04 and  
598 BOM2A. Initial alpha dose estimates for these samples range from  $\sim 6 \times 10^{15}$  to  $7 \times 10^{17}$   $\alpha/g$   
599 (Fig. 6). Fractures spatially associated with large mineral inclusions in  ~~$\mu$ CT images of~~  
600 chemically abraded residues still play an important role as acid conduits to grain  
601 interiors (Fig. 14d, Fig. 16a, Fig. 17a). We again interpret such fractures to most likely  
602 form during laboratory annealing at 900 °C for 48 h due to internal stresses caused by  
603 differences in coefficients of thermal expansion (Crowningshield and Nassau, 1981;  
604 Nassau, 1981; Subbarao et al., 1990; Hovis et al., 2015). Fracturing related to radiation  
605 damage zoning, however, does not appear to contribute to zircon dissolution in  
606 samples with ~~less~~ radiation damage and more muted intracrystalline variations. In

607

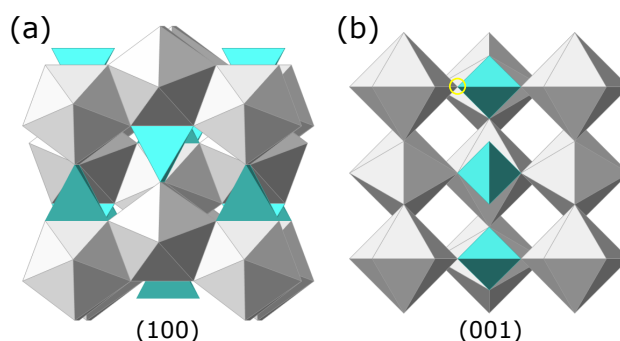

Figure 19: Projections of the zircon crystal structure (Hazen and Finger, 1979; Finch and Hanchar, 2003).  $\text{ZrO}_8$  polyhedra are in light gray and  $\text{SiO}_4$  tetrahedra are in teal. (a) Projection on (100) looking down the  $a$ -axis. The  $c$ -axis is vertical to the page, and the  $a_2$ -axis is horizontal. (b) Projection on (001) looking down the  $c$ -axis. The yellow circle highlights the corner-sharing bonds between the  $\text{SiO}_4$  tetrahedra and the  $\text{ZrO}_8$  polyhedra. Projections were rendered using CrystalMaker® software.

608

609 some samples though, ~~results suggest that~~ chemical abrasion ~~does~~ dissolve some  
610 soluble concentric zones from crystal interiors (Fig. 15a).

611

612 Other mechanisms by which acid reaches a grain interior<sup>s</sup> is via the dissolution of  
613 surface reaching inclusions (Fig. 14d, 15a, 16d) and the percolation of acid across  
614 regions with higher defect densities and overlapping etch pits (Fig. 15, Fig. 16a, Fig. 17a-  
615 b). In some samples, chemical abrasion dissolves large volumes from crystal cores  
616 without clear structural reasons (Fig. 15c-d, Fig. 17e). This could reflect the dissolution  
617 of zones with more radiation damage, but the pattern of material dissolved does not  
618 obviously conform with the growth zonation patterns expected for these samples.  
619 Combined, these various acid paths lead to the dissolution of some – but not all –  
620 interior inclusions.

621

622 Importantly,  $\mu\text{CT}$  measurements indicate that dissolution in highly crystalline material  
623 is crystallographically-controlled and strongly anisotropic. Most dissolution occurs  
624 along the  $c$ -axis. Etch pits preserved on (100) suggest that dissolution along the  $a$ -axis is  
625 mostly limited to ~~the dissolution of~~ defects that intersect the grain surface. In the (100)  
626 and (010) projections of the zircon structure  $\text{ZrO}_8$  polyhedra share edges with adjacent  
627  $\text{ZrO}_8$  polyhedra and  $\text{SiO}_4$  tetrahedra (Fig. 20) (Hazen and Finger, 1979; Finch and  
628 Hanchar, 2003). Whereas in the (001) projection ~~of the zircon structure,~~  $\text{ZrO}_8$  polyhedra  
629 share edges with adjacent  $\text{ZrO}_8$  polyhedra and *corners* with adjacent  $\text{SiO}_4$  tetrahedra.  
630 ~~Based on our findings, we~~ infer that these ~~corner sharing bonds in the (001) plane~~ are  
631 easier to break during dissolution than the solely edge-sharing bonds ~~in the (100) and~~  
632 ~~(010) planes~~ causing faster dissolution along the  $c$ -axis. Increasing the leaching



633 temperature from 180 °C to 210 °C leads a more significant shortening of a crystal's  
634 aspect ratio and greater volume loss. In the absence of acid pathways into crystal  
635 interiors, grains with low radiation damage predominantly dissolve from rim-to-core  
636 along the crystal's *c*-axis (Fig. 14a, Fig. 15b, and Fig. 16c).

637

638 Leaching temperature has the strongest control over volume loss in the two samples  
639 analyzed. The slight differences between the BOM2A and KR18-04 minimum volume  
640 loss estimates suggest that a crystal's bulk radiation damage also plays an important  
641 role. Crystal morphology plays a lesser role in that crystals with very high aspect ratios  
642 dissolve more slowly than more equant grains. A grain's initial surface-to-volume ratio  
643 appears to have no measurable effect on volume loss.

644

## 645 4.2 Implications for ID-TIMS U-Pb geochronology

646

### 647 4.2.1 Zircon U-Pb ages

648

649 The purpose of chemical abrasion is to remove soluble, radiation-damaged domains  
650 prior to U-Pb isotopic analysis to mitigate the ~~negative~~ effects of Pb loss ~~on~~  
651 ~~geochronological outcomes~~ (Mattinson et al., 2005; 2011). Recent studies have assessed  
652 how different annealing temperatures and partial dissolution conditions affect the U-Pb  
653 isotopic and trace elemental composition of zircon residues (Huyskens et al., 2016;  
654 Widmann et al., 2019). The goal of this study is to construct a mechanistic  
655 understanding of zircon dissolution and identify possible implications for U-Pb dating  
656 ~~upon which future geochronological and geochemical investigations – such as the~~  
657 ~~single crystal stepwise partial dissolution experiments that are currently underway by~~  
658 ~~authors AJM and BS – can build.~~

659

660 ~~Magmatic~~ crystallization of zircon occurs over a period of time within a magma  
661 chamber. As such, zircon cores are intrinsically older than zircon rims. A rim-to-core  
662 model for zircon dissolution implicitly suggests that dissolving more zircon during  
663 chemical abrasion by either increasing the temperature or duration of leaching will  
664 remove a greater portion of a crystal's rim and bias its U-Pb date toward an older value.  
665 This is especially concerning for geochronological studies of volcanic rocks where the  
666 youngest U-Pb date or population of dates is often taken to represent the age of a  
667 volcanic eruption.

668

669 Our results suggest that most zircon crystals with intermediate-to-high levels of  
670 radiation damage do not predominantly dissolve from rim-to-core. While increasing the  
671 intensity of chemical abrasion leads to textures indicative of greater volume loss, much  
672 of that added loss is from the dissolution of interior zones as opposed to the progressive





673 dissolution of crystal rims. Consequently, a typical U-Pb analysis of a zircon residue is  
674 more likely to reflect the dissolution of soluble high U zones irrespective of age  
675 variation within single grains. In addition to high U zones, inclusions and zircon  
676 material surrounding fractures are also dissolved. As such, U-Pb analyses of zircon  
677 residues with initial intermediate-to-high radiation damage are more likely to broadly  
678 reflect mixed core-rim ages.

679  
680 Some lower damage grains do predominantly dissolve from rim-to-core along a  
681 crystal's *c*-axis. This is most apparent in samples leached at 210 °C for 12 h. Growth  
682 zones along *c* are often broader than growth zones along *a*, so a volumetrically greater  
683 portion of younger domains are likely removed due to *c*-preferential dissolution;  
684 however, since rim material on (100) is preserved due to limited dissolution along *a*,  
685 there remains a mixed core-rim age component. Further, our analysis suggests that  
686 zircon material is commonly dissolved from crystal interiors in lower damage grains.  
687 As such, whether hot leaching causes residue ages to be biased toward older values is  
688 likely to depend on crystal-dependent factors such as the number, size, and distribution  
689 of mineral inclusions, the distribution of higher U domains, and pre-existing fractures.

690  
691 In regard to lower damage grains, another point to consider is that our Raman results  
692 for chemically abraded zircon residues suggest that small differences in initial alpha  
693 doses in low damage grains do not appear to dramatically affect which portions of a  
694 grain dissolve. This observation evokes an important question – why does chemical  
695 abrasion work to mitigate Pb loss in young, lower damage samples? Perhaps the even  
696 more fundamental question is – why does Pb loss occur in highly crystalline grains?  
697 Further work is needed to address these outstanding questions.

698  
699 In most samples regardless of initial damage content, ~~we find that~~ chemical abrasion at  
700 210 °C is more effective at mining out soluble zones from crystal interiors. Based on our  
701 mechanistic blueprint, we predict that hotter leaching temperatures are thus more likely  
702 to better mitigate Pb-loss in geochronological datasets. An important caveat, however,  
703 is that hot leaching may not be appropriate for all samples. Our  $\mu$ CT volume estimates  
704 indicate that even in low-to-intermediate damage grains 12 h of partial dissolution at  
705 210 °C can dissolve ~25 to 50% of a grain. This means a substantial portion of radiogenic  
706 Pb is lost prior to U-Pb isotopic analysis of the zircon residue lowering the precision of  
707 the analysis. This is potentially problematic for young or low-U samples. Even greater  
708 volume losses are expected for higher damage grains. More U-Pb isotopic investigations  
709 of different chemical abrasion protocols – such as single-crystal stepwise partial  
710 dissolution experiments – are needed to find the correct balance between removing  
711 domains affected by Pb-loss while preserving enough closed-system material for high-  
712 precision geochronological analysis.



713

714 On a secondary note, our study shows that in addition to radiation damage other  
715 intrinsic defects such as dislocations are also preferentially dissolved by chemical  
716 abrasion. Atom probe studies have shown that dislocation loops can sequester  
717 radiogenic Pb and other incompatible trace elements redistributed during shock,  
718 metamorphism, or deformation (Reddy et al. 2016, Peterman et al. 2016; 2019).  
719 Removing sequestered radiogenic Pb from dislocations by HF leaching should in theory  
720 increase U-Pb discordance. However, as radiation damaged domains affected by Pb loss  
721 are also dissolved during one-step chemical abrasion, leaching likely leads to a net  
722 decrease in U-Pb discordance of the dated residue. Early efforts at stepwise chemical  
723 abrasion, however, do suggest that partial dissolution can leach some radiogenic Pb  
724 from undigested zircon residues in unannealed grains – perhaps from dislocations –  
725 leading to unwanted U and Pb elemental and Pb isotopic fractionation in early leaching  
726 steps (Davis and Krogh, 2000; Mattinson, 2005).

727

#### 728 4.2.2 Inclusions and zircon trace element analyses

729

730 Integrating chemical abrasion ID-TIMS U-Pb dates with trace element analyses (TEA) of  
731 the same volume of dissolved zircon can provide important information about  
732 petrogenetic processes (Schoene et al. 2010b). Incompatible trace elements such as  
733 common Pb, LREEs, Fe, Al, Ca, and Mn can be introduced during metamictization or  
734 hydrothermal alteration (Geisler et al., 2001b; Takehara et al., 2018). Our data ~~suggest~~  
735 that damaged zones are readily dissolved during chemical abrasion, and thus should  
736 not affect TEA of zircon residues. The integrative TEA approach, however, broadly  
737 assumes that inclusions are also dissolved during chemical abrasion, such that the final  
738 volume analyzed is zircon as opposed to a zircon-inclusion mixture. A zircon-inclusion  
739 mixture would likely result in anomalous trace element concentrations and – if  
740 inclusions are Pb-bearing – ~~artificially~~ high common Pb contents which ~~can~~ affect the  
741 precision of the U-Pb analysis (Bell et al. 2019). While geochronologists endeavor to  
742 select inclusion-free grains, this is not possible for all zircon samples. Further, not all  
743 inclusions can be identified optically with a standard binocular picking scope ~~and~~  
744 ~~excluded from consideration.~~

745

746 The fate of inclusions during chemical abrasion has never been rigorously investigated.  
747 Our data suggest that inclusions are readily dissolved in grains with intermediate-to-  
748 high radiation damage densities due to the development of stress fractures that form  
749 presumably during laboratory annealing at 900 °C. These findings strongly emphasize  
750 that the annealing step of chemical abrasion is important not just for minimizing  
751 leaching-induced elemental and isotopic fractionation (Mattinson, 2005; 2011), but also  
752 for building acid paths into grain interiors for to dissolve inclusions. In lower damage



753 grains, fracturing can remove large inclusions during partial dissolution, but some  
754 inclusions – especially small ones armored by highly crystalline zircon – can survive 12  
755 h of chemical abrasion at 210 °C. ~~As such, some lower damage residues may be~~  
756 ~~susceptible to inclusion contamination.~~ Increasing the leaching temperature from 180 °C  
757 to 210 °C ~~seems to~~ improve the likelihood that inclusions will be removed, but it does not  
758 guarantee it. All surface-reaching inclusions, however, are dissolved at the tested  
759 leaching conditions.

760

#### 761 4.3 Implications for radiation damage annealing models

762

763 Previous annealing studies (Zhang et al., 2000; Geisler et al., 2001a; Ginster et al., 2019;  
764 Härtel et al., 2021; Ende et al., 2021) and the Raman analyses presented here  
765 demonstrate that heating in air at 900 °C for 48 hours anneals a significant fraction of  
766 radiation damage in zircon crystals with intermediate-to-high ~~initial~~ radiation damage.  
767 The change in the relationship between the widths of the  $\nu_3(\text{SiO}_4)$  and  $E_g$  peaks (Fig. 5a  
768 and Fig. 6a), however, suggest that annealing or radiation damage is not simply the  
769 inverse of damage accumulation – i.e. bounding environments in zircon partially  
770 annealed by dry laboratory heating are different than bounding environments in zircon  
771 affected only by damage accumulation. Given this observation, we caution that an  
772 equivalent  $\nu_3(\text{SiO}_4)$  peak width – or derived alpha dose estimate – for an annealed grain  
773 and for a grain affected only by damage accumulation is unlikely to reflect equivalent  
774 damage states which has important implications for the use of Raman-based annealing  
775 models (Ginster et al., 2019).

776

777 There is also an apparent change in the relationship between the widths of the  $\nu_3(\text{SiO}_4)$   
778 and  $E_g$  peak after partial dissolution in HF acid in some samples, and a small number of  
779 Raman analyses for chemically abraded residues are more crystalline than their  
780 annealed counter parts (Fig. 5b and Fig. 6b). Taken together, we interpret these  
781 observations to suggest that some radiation damage is annealed hydrothermally during  
782 HF leaching in some samples. This is somewhat surprising given how much hotter the  
783 earlier dry-annealing step is compared to the partial dissolution temperature (180 or 210  
784 °C). Nonetheless, Widman and colleagues (2019) report similar findings in their study  
785 of chemically abraded Plešovice zircon; some of their chemically abraded zircon  
786 residues also had more crystalline Raman signatures than zircon fragments that were  
787 dry-annealed only.

788

789 Together these studies contribute to a large body of experimental evidence that  
790 indicates that radiation damage in zircon partially anneals at low temperatures under  
791 hydrothermal conditions on short, laboratory timescales (Rizvanova et al. 2000; Geisler  
792 et al. 2001b, 2002, 2003). Annealing as well as other recrystallization reactions in zircon



793 are likely catalyzed by hydrogen diffusion and ionic exchange reactions between zircon  
794 and other soluble cations (Petit et al. 1989, Geisler et al. 2001b, Takehara et al. 2018). As  
795 such, the extent to which radiation damage anneals in wet geological environments –  
796 and how deeply wet annealing effects extend into crystal interiors – likely depends on a  
797 combination of heating temperature, heating duration, and the composition of  
798 hydrothermal fluids (Geisler et al. 2001b, 2002).

799

800 The kinetics of dry versus wet annealing clearly differ as evidenced by their discrepant  
801 temperature sensitivities and hypothesized mechanistic processes. Given the prevalence  
802 of fluids in geological environments, it could be argued that geological annealing of  
803 radiation damage in zircon most often occurs under hydrothermal conditions.

804 However, most radiation damage annealing models are based on dry annealing kinetics  
805 that may poorly approximate geological conditions (Zhang et al. 2000, Geisler et al.  
806 2001a, Yamada et al. 2007, Ginster et al. 2019, Härtel et al. 2021). Some of these models  
807 are embedded in thermal modeling programs and used to interpret time-temperature  
808 histories from complex zircon fission track and (U-Th)/He datasets (Guenther et al.  
809 2013, Guenther 2021). As such, quantifying zircon radiation damage annealing kinetics  
810 under hydrothermal conditions could help to improve interpretations of deep-time low-  
811 temperature thermochronology datasets. Wet annealing studies would likely also  
812 advance our understanding of how Pb is lost from the zircon crystal structure in  
813 geological environments. This knowledge could potentially be used to tailor chemical  
814 abrasion protocols to improve U-Pb geochronological outcomes for zircon crystals  
815 affected by one or more episodes of hydrothermal annealing.

816

#### 817 **4.4 Imaging radiation damage zoning: Implications for (U-Th)/He thermochronology**

818 The accumulation of radiation damage in zircon has a profound impact on He diffusion  
819 kinetics and applications of ~~deep-time~~ zircon (U-Th)/He thermochronology (Guenther  
820 et al. 2013; Cherniak, 2019; Anderson et al. 2017; 2020b). While cathodoluminescence  
821 imaging and Raman 2D spectral mapping have previously been used to either  
822 qualitatively or quantitatively characterize the distribution of radiation damage in  
823 polished zircon grains prior to laser ablation zircon (U-Th)/He analyses (Danisík et al.,  
824 2017; Anderson et al., 2017; 2020a), finding a method for rapid and non-destructive 3D  
825 characterization of strong radiation damage zoning in unpolished grains for single-  
826 crystal zircon (U-Th)/He dating has remained elusive.  $\mu$ CT offers ~~an exciting new~~ way  
827 to quickly screen zircon grains for strong radiation damage zoning prior to (U-Th)/He  
828 analysis. Strongly zoned grains could either be excluded from datasets or corrections  
829 could be applied to account for expected intracrystalline variations in He diffusivity.  
830  $\mu$ CT data can also be used to identify ~~mineral phases or~~ inclusions and intergrowths  
831 that might impact He systematics (Cooperdock et al., 2016; Cooperdock and Stockli,



832 2018; Cooperdock et al. 2022), and improve alpha ejection corrections by generating  
833 more robust surface area-to-volume estimates (Cooperdock et al., 2019) ~~and providing~~  
834 ~~key insights into compositional zoning.~~

## 835 5 Conclusions

836 ~~Here we present results for a microstructural investigation – X-ray micro-computed~~  
837 ~~tomography ( $\mu$ CT), scanning electron microscopy, and Raman spectroscopy data – of~~  
838 ~~zircon crystals before and after chemical abrasion that yield new insights into the~~  
839 ~~mechanics of zircon dissolution during HF digestion. Selected samples have a range of~~  
840 ~~accumulated alpha doses that cover nearly the full radiation damage spectrum. SE~~  
841 ~~images of chemically abraded zircon residues show that high-U oscillatory zones,~~  
842 ~~radiation damage defects, and other intrinsic defects such as lattice dislocations are~~  
843 ~~preferentially dissolved during acid digestion. In higher damage materials etch pits~~  
844 ~~generally have diamond-like shapes that closely resemble etched fission tracks. At~~  
845 ~~longer leaching durations and in more crystalline zircon samples, etch pit morphology~~  
846 ~~becomes increasingly prismatic due to crystallographically-controlled dissolution. The~~  
847 ~~interconnectivity of etch pits in SE images demonstrates how acid can percolate across~~  
848 ~~regions with high defect densities. Dumbbell features that crosscut radiation damage~~  
849 ~~zones in some SE images highlight the important role that fracturing related to~~  
850 ~~radiation damage accumulation and/or annealing plays in the dissection of higher~~  
851 ~~damage grains. SE images of zircon residues also show that fractures commonly~~  
852 ~~crosscut voids where inclusions once were.~~

853 We pair our surface texture catalog with  $\mu$ CT images of the same grains acquired before  
854 and after chemical abrasion to understand the effects of HF leaching on crystal cores.  
855 ~~We find that~~ the density contrast between crystalline and metamict zircon is apparent in  
856  $\mu$ CT images, making  $\mu$ CT an effective tool for the rapid – and non-destructive –  
857 ~~imaging of strong radiation damage zoning in zircon in 3D. We find that most~~ zircon  
858 crystals, especially higher damage grains, do not dissolve predominantly from rim-to-  
859 core. Low-density rims and interior zones visible in  $\mu$ CT images are dissolved during  
860 low intensity chemical abrasion. However, leaching also removes oscillatory zones,  
861 material around fractures, and some inclusions from crystal cores. The main  
862 mechanisms by which acid reaches grain interiors is via fracturing due to internal  
863 stresses caused by radiation damage zoning and inclusions and dissolved surface-  
864 reaching inclusions. While many fractures formed geologically, we hypothesize that dry  
865 laboratory annealing at 900 °C prior to HF leaching likely contributes to fracture  
866 development, making dry annealing a critical step of the chemical abrasion process.  
867 Increasing the leaching temperature from 180 °C to 210 °C or increasing the leaching



868 duration leads to the development of more extensive dissolution networks in higher  
869 damage grains.

870 More crystalline zircon samples lack fracturing related to radiation damage zoning.  
871 Acid still, however, reaches the interior of many crystals via the other acid paths  
872 described. Some but not all mineral inclusions are removed after 12 h of chemical  
873 abrasion.  $\mu$ CT measurements show that dissolution in lower damage grains is strongly  
874 anisotropic. Most dissolution occurs along the crystallographic *c*-axis with minimal  
875 dissolution occurring along *a*. Even in lower damage grains, bulk radiation damage  
876 appears to be the major factor controlling the degree of volume loss during partial  
877 dissolution. Increasing the leaching temperature from 180 °C to 210 °C leads to an up to  
878 ~40 % increase in volume loss in the lower-damage grains analyzed.

879 We broadly discuss potential implications for applications of ID-TIMS U-Pb  
880 geochronology. Since most crystals analyzed do not follow a simple rim-to-core  
881 dissolution pattern, we expect that most U-Pb analyses of zircon residues reflect mixed  
882 core-rim age components. Chemical abrasion at 210 °C appears to more effectively mine  
883 out soluble zones from crystal interiors, however increasing the leaching temperature  
884 210 °C also results in higher volume losses that could result in lower-precision U-Pb  
885 analyses. More ID-TIMS U-Pb data – such as single crystal step-wise degassing  
886 experiments conducted using different leaching conditions – are needed to identify the  
887 best balance between removal of damaged material compromised by Pb loss and  
888 removal of excess closed-system material. Since some inclusions appear to survive 12 h  
889 of chemical abrasion in lower damage samples, trace element analyses of highly  
890 crystalline zircon should be evaluated for possible inclusion contamination.

891 Raman analyses of annealed grains suggest that dry annealing is not the inverse of  
892 radiation damage accumulation. Further, Raman data for chemically abraded zircon  
893 residues presents additional evidence that some radiation damage anneals  
894 hydrothermally at low temperatures (180 °C to 210 °C) which has important  
895 implications for the usefulness of current Raman-based dry radiation damage annealing  
896 models. We also suggest the  $\mu$ CT imaging could be a useful tool for studying the effects  
897 of radiation damage zoning on He diffusion in 3D and for applications of deep-time  
898 zircon (U-Th)/He thermochronology.

899 **Supplement.** The supplement to this article is available online at:

900 **Author Contributions.** AJM designed and conducted the experiments. All authors  
901 participated in the interpretation of the experimental results. AJM prepared the figures  
902 and manuscript.



903 **Competing Interests.** The authors declare no competing interests.

904 **Acknowledgements.** We would like to thank Jessie Maisano of the University of Texas  
905 High Resolution CT facility for helping us to acquire  $\mu$ CT data during the height of the  
906 global pandemic, and Tom Duffy of Princeton University for use of his Raman system.  
907 Thank you also to Mami Takehara of the National Institute of Polar Research in Tokyo,  
908 Japan for providing the hydrothermally altered AS3 zircon crystals used in this study.  
909 We are indebted to Tyler McKanna for providing computing resources, and we would  
910 also like to thank Dawid Szymanowski for many hours of valuable discussion.

911 **Financial support.** This work was supported by research funds provided by the  
912 Department of Geosciences at Princeton University granted to Alyssa J. McKanna as  
913 part of her Harry Hess Postdoctoral Fellowship.

914 **Review Statement.**

915 **References**

916 Anderson, A. J., Hodges, K. V., and van Soest, M. C.: Empirical constraints on the effects of  
917 radiation damage on helium diffusion in zircon, *Geochim. Cosmochim. Acta*, 218, 308–322,  
918 <https://doi.org/10.1016/j.gca.2017.09.006>, 2017.

919  
920 Anderson, A. J., Hanchar, J. M., Hodges, K. V., and van Soest, M. C.: Mapping radiation  
921 damage zoning in zircon using Raman spectroscopy: Implications for zircon chronology, *Chem.*  
922 *Geol.*, 538, 119494, <https://doi.org/10.1016/j.chemgeo.2020.119494>, 2020a.

923  
924 Anderson, A. J., van Soest, M. C., Hodges, K. V., and Hanchar, J. M.: Helium diffusion in  
925 zircon: Effects of anisotropy and radiation damage revealed by laser depth profiling, *Geochim.*  
926 *Cosmochim. Acta*, 274, 45–62, <https://doi.org/10.1016/j.gca.2020.01.049>, 2020b.

927  
928 Basu, A. R., Chakrabarty, P., Szymanowski, D., Ibañez-Mejia, M., Schoene, B., Ghosh, N., and  
929 Georg, R. B.: Widespread silicic and alkaline magmatism synchronous with the Deccan Traps  
930 flood basalts, India, *Earth Planet. Sci. Lett.*, 552, 116616,  
931 <https://doi.org/10.1016/j.epsl.2020.116616>, 2020.

932  
933 Bell, E. A., Boehnke, P., Barboni, M., and Harrison, T. M.: Tracking chemical alteration in  
934 magmatic zircon using rare earth element abundances, *Chem. Geol.*, 510, 56–71,  
935 <https://doi.org/10.1016/j.chemgeo.2019.02.027>, 2019.

936  
937 Bowring, S. A. and Schmitz, M. D.: High-precision U-Pb zircon geochronology and the  
938 stratigraphic record, in: *Reviews in Mineralogy and Geochemistry Zircon*, vol. 53, edited by:  
939 Hanchar, J. M. and Hoskin, P. W. O., 305–326, <https://doi.org/10.2113/0530305>, 2003.

940



- 941 Chakoumakos, B. C., Murakami, T., Lumpkin, G. R., and Ewing, R. C.: Alpha-decay induced  
942 fracturing in zircon: The transition from the crystalline to the metamict state, *Science*, 236,  
943 1556–1559, 1987.  
944
- 945 Cherniak, D. J.: Diffusion of helium in radiation-damaged zircon, *Chem. Geol.*, 529, 119308,  
946 <https://doi.org/10.1016/j.chemgeo.2019.119308>, 2019.  
947
- 948 Cooperdock, E. H. G. and Stockli, D. F.: Unraveling alteration histories in serpentinites and  
949 associated ultramafic rocks with magnetite (U–Th)/He geochronology, *Geology*, 44, 967–970,  
950 <https://doi.org/10.1130/g38587.1>, 2016.  
951
- 952 Cooperdock, E. H. G. and Stockli, D. F.: Dating exhumed peridotite with spinel (U–Th)/He  
953 chronometry, *Earth Planet. Sci. Lett.*, 489, 219–227, <https://doi.org/10.1016/j.epsl.2018.02.041>,  
954 2018.  
955
- 956 Cooperdock, E. H. G., Ketcham, R. A., and Stockli, D. F.: Resolving the effects of 2-D versus 3-  
957 D grain measurements on apatite (U–Th)/He age data and reproducibility, *Gchron.*, 1, 17–41,  
958 <https://doi.org/10.5194/gchron-1-17-2019>, 2019.  
959
- 960 Cooperdock, E. H. G., Hofmann, F., Collins, R. M., Carrera, A., Takase, A., and Celestian, A. J.:  
961 Technical note: Rapid phase identification of apatite and zircon grains for geochronology using  
962 X-ray micro-computed tomography, *GChron.*, Preprint, <https://doi.org/10.5194/gchron-2022-7>,  
963 2022.  
964
- 965 Crowningshield, R. and Nassau, K.: The Heat and Diffusion Treatment of Natural and Synthetic  
966 Sapphires, *J. Gemmology*, 17, 528–541, <https://doi.org/10.15506/jog.1981.17.8.528>, 1981.  
967
- 968 Danišik, M., McInnes, B. I. A., Kirkland, C. L., McDonald, B. J., Evans, N. J., and Becker, T.:  
969 Seeing is believing: Visualization of He distribution in zircon and implications for thermal  
970 history reconstruction on single crystals, *Sci. Adv.*, 3, e1601121,  
971 <https://doi.org/10.1126/sciadv.1601121>, 2017.  
972
- 973 Davis, D. W. and Krogh, T. E.: Preferential dissolution of  $^{234}\text{U}$  and radiogenic Pb from  $\alpha$ -recoil-  
974 damaged lattice sites in zircon: implications for thermal histories and Pb isotopic fractionation in  
975 the near surface environment, *Chem. Geol.*, 172, 41–58, [https://doi.org/10.1016/s0009-  
976 2541\(00\)00235-7](https://doi.org/10.1016/s0009-2541(00)00235-7), 2000.  
977
- 978 Davydov, V. I., Crowley, J. L., Schmitz, M. D., and Poletaev, V. I.: High-precision U–Pb zircon  
979 age calibration of the global Carboniferous time scale and Milankovitch band cyclicity in the  
980 Donets Basin, eastern Ukraine, *Geochem. Geophys. Geosyst.*, 11, n/a–n/a,  
981 <https://doi.org/10.1029/2009gc002736>, 2010.  
982
- 983 Ende, M., N., C. C., Reiners, P. W., Zamyatin, D. A., Gain, S. E. M., Wirth, R., and Nasdala, L.:  
984 Dry annealing of radiation-damaged zircon: Single-crystal X-ray and Raman spectroscopy study,  
985 *Lithos*, 406, 106523, <https://doi.org/10.1016/j.lithos.2021.106523>, 2021.  
986





- 987 Ewing, R. C., Meldrum, A., Wang, L., Weber, W. J., and Corrales, L. R.: Radiation effects in  
988 zircon, in: *Reviews in Mineralogy & Geochemistry*, vol. 53, edited by: Hanchar, J. M. and  
989 Hoskin, P. W. O., 387–425, <https://doi.org/10.2113/0530387>, 2003.  
990
- 991 Finch, R. J. and Hanchar, J. M.: Structure and chemistry of zircon and zircon-group minerals, in:  
992 *Reviews in Mineralogy and Geochemistry Zircon*, vol. 53, edited by: Hanchar, J. M. and Hoskin,  
993 P. W. O., 1–25, <https://doi.org/10.2113/0530001>, 2003.  
994
- 995 Geisler, T., Pidgeon, R. T., Bronswijk, W. van, and Pleysier, R.: Kinetics of thermal recovery  
996 and recrystallization of partially metamict zircon: a Raman spectroscopic study, *Eur. J. Mineral.*,  
997 13, 1163–1176, <https://doi.org/10.1127/0935-1221/2001/0013-1163>, 2001a.  
998
- 999 Geisler, T., Ulonska, M., Schleicher, H., Pidgeon, R. T., and Bronswijk, W. van: Leaching and  
1000 differential recrystallization of metamict zircon under experimental hydrothermal conditions,  
1001 *Contrib. Mineral. Petr.*, 141, 53–65, <https://doi.org/10.1007/s004100000202>, 2001b.  
1002
- 1003 Geisler, T., Pidgeon, R. T., Bronswijk, W. van, and Kurtz, R.: Transport of uranium, thorium,  
1004 and lead in metamict zircon under low-temperature hydrothermal conditions, *Chem. Geol.*, 191,  
1005 141–154, [https://doi.org/10.1016/s0009-2541\(02\)00153-5](https://doi.org/10.1016/s0009-2541(02)00153-5), 2002.  
1006
- 1007 Geisler, T., Trachenko, K., Ríos, S., Dove, M. T., and Salje, E. K. H.: Impact of self-irradiation  
1008 damage on the aqueous durability of zircon (ZrSiO<sub>4</sub>): implications for its suitability as a nuclear  
1009 waste form, *J. Phys. Condens. Matter*, 15, L597, <https://doi.org/10.1088/0953-8984/15/37/107>,  
1010 2003.  
1011
- 1012 Ginster, U., Reiners, P. W., Nasdala, L., and N., C. C.: Annealing kinetics of radiation damage in  
1013 zircon, *Geochim. Cosmochim. Acta*, 249, 225–246, <https://doi.org/10.1016/j.gca.2019.01.033>,  
1014 2019.  
1015
- 1016 Gleadow, A. J. W., Hurford, A. J., and Quaife, R. D.: Fission track dating of zircon: Improved  
1017 etching techniques, *Earth Planet. Sci. Lett.*, 33, 273–276, [https://doi.org/10.1016/0012-821x\(76\)90235-1](https://doi.org/10.1016/0012-821x(76)90235-1), 1976.  
1018
- 1019 Guenther, W. R.: Implementation of an alpha damage annealing model for zircon (U-Th)/He  
1020 Thermochronology with comparison to a zircon fission track annealing model, *Geochem.*  
1021 *Geophys. Geosyst.*, 22, <https://doi.org/10.1029/2019gc008757>, 2021.  
1022
- 1023 Guenther, W. R., Reiners, P. W., Ketcham, R. A., Nasdala, L., and Giester, G.: Helium  
1024 diffusion in natural zircon: Radiation damage, anisotropy, and the interpretation of zircon (U-  
1025 Th)/He thermochronology, *Am. J. Sci.*, 313, 145–198, <https://doi.org/10.2475/03.2013.01>, 2013.  
1026
- 1027 Härtel, B., Jonckheere, R., Wauschkuhn, B., and Ratschbacher, L.: The closure temperature(s) of  
1028 zircon Raman dating, *GChron.*, 3, 259–272, <https://doi.org/10.5194/gchron-3-259-2021>, 2021.  
1029
- 1030 Hazen, R. M. and Finger, L. W.: Crystal structure and compressibility of zircon at high pressure,  
1031 *Am. Mineral.*, 64, 196–201, 1979.  
1032



- 1033  
1034 Holland, H. D. and Gottfried, D.: The effect of nuclear radiation on the structure of zircon, *Acta*  
1035 *Crystallogr.*, 8, 291–300, <https://doi.org/10.1107/s0365110x55000947>, 1955.  
1036  
1037 Hovis, G., Abraham, T., Hudacek, W., Wildermuth, S., Scott, B., Altomare, C., Medford, A.,  
1038 Conlon, M., Morris, M., Leaman, A., Almer, C., Tomaino, G., and Harlov, D.: Thermal  
1039 expansion of F-Cl apatite crystalline solutions, *Am. Mineral.*, 100, 1040–1046,  
1040 <https://doi.org/10.2138/am-2015-5176>, 2015.  
1041  
1042 Huyskens, M. H., Zink, S., and Amelin, Y.: Evaluation of temperature-time conditions for the  
1043 chemical abrasion treatment of single zircons for U–Pb geochronology, *Chem. Geol.*, 438, 25–  
1044 35, <https://doi.org/10.1016/j.chemgeo.2016.05.013>, 2016.  
1045  
1046 Jonckheere, R.: On the densities of etchable fission tracks in a mineral and co-irradiated external  
1047 detector with reference to fission-track dating of minerals, *Chem. Geol.*, 200, 41–58,  
1048 [https://doi.org/10.1016/s0009-2541\(03\)00116-5](https://doi.org/10.1016/s0009-2541(03)00116-5), 2003.  
1049  
1050 Jonckheere, R. and haute, P. V. den: Observations on the geometry of etched fission tracks in  
1051 apatite: Implications for models of track revelation, *Am. Mineral.*, 81, 1476–1493, 1996.  
1052  
1053 Jonckheere, R., Enkelmann, E., and Stübner, K.: Observations on the geometries of etched  
1054 fission and alpha-recoil tracks with reference to models of track revelation in minerals, *Radiat.*  
1055 *Meas.*, 39, 577–583, <https://doi.org/10.1016/j.radmeas.2004.08.008>, 2005.  
1056  
1057 Jonckheere, R., Aslanian, C., Wauschkuhn, B., and Ratschbacher, L.: Fission-track etching in  
1058 apatite: A model and some implications, *Am. Mineral.*, 107, 1190–1200,  
1059 <https://doi.org/10.2138/am-2022-8055>, 2022.  
1060  
1061 Jones, S., Kohn, B., and Gleadow, A.: Etching of fission tracks in monazite: Further evidence  
1062 from optical and focused ion beam scanning electron microscopy, *Am. Mineral.*, 107, 1065–  
1063 1073, <https://doi.org/10.2138/am-2022-8002>, 2022.  
1064  
1065 Ketcham, R. A., Guenther, W. R., and Reiners, P. W.: Geometric analysis of radiation damage  
1066 connectivity in zircon, and its implications for helium diffusion, *Am. Mineral.*, 98, 350–360,  
1067 <https://doi.org/10.2138/am.2013.4249>, 2013.  
1068  
1069 Lee, J. K. W. and Tromp, J.: Self-induced fracture generation in zircon, *J. Geophys. Res. Solid*  
1070 *Earth*, 100, 17753–17770, <https://doi.org/10.1029/95jb01682>, 1995.  
1071  
1072 MacLennan, S. A., Eddy, M. P., Merschat, A. J., Mehra, A. K., Crockford, P. W., Maloof, A. C.,  
1073 Southworth, C. S., and Schoene, B.: Geologic evidence for an icehouse Earth before the Sturtian  
1074 global glaciation, *Sci. Adv.*, 6, eaay6647, <https://doi.org/10.1126/sciadv.aay6647>, 2020.  
1075  
1076 Mattinson, J. M.: Zircon U–Pb chemical abrasion (“CA-TIMS”) method: Combined annealing  
1077 and multi-step partial dissolution analysis for improved precision and accuracy of zircon ages,  
1078 *Chem. Geol.*, 220, 47–66, <https://doi.org/10.1016/j.chemgeo.2005.03.011>, 2005.



- 1079  
1080 Mattinson, J. M.: Extending the Krogh legacy: development of the CA-TIMS method for zircon  
1081 U-Pb geochronology, *Can. J. Earth Sci.*, 48, 95–105, <https://doi.org/10.1139/e10-023>, 2011.  
1082  
1083 Meldrum, A., Boatner, L. A., Weber, W. J., and Ewing, R. C.: Radiation damage in zircon and  
1084 monazite, *Geochim. Cosmochim. Acta*, 62, 2509–2520, [https://doi.org/10.1016/s0016-](https://doi.org/10.1016/s0016-7037(98)00174-4)  
1085 [7037\(98\)00174-4](https://doi.org/10.1016/s0016-7037(98)00174-4), 1998.  
1086  
1087 Meyers, S. R., Siewert, S. E., Singer, B. S., Sageman, B. B., Condon, D. J., Obradovich, J. D.,  
1088 Jicha, B. R., and Sawyer, D. A.: Intercalibration of radioisotopic and astrochronologic time  
1089 scales for the Cenomanian-Turonian boundary interval, Western Interior Basin, USA, *Geology*,  
1090 40, 7–10, <https://doi.org/10.1130/g32261.1>, 2012.  
1091  
1092 Mezger, K. and Krogstad, E. J.: Interpretation of discordant U-Pb zircon ages: An evaluation, *J.*  
1093 *Metamorph. Geol.*, 15, 127–140, <https://doi.org/10.1111/j.1525-1314.1997.00008.x>, 1997.  
1094  
1095 Mundil, R., Ludwig, K. R., Metcalfe, I., and Renne, P. R.: Age and timing of the Permian mass  
1096 extinctions: U/Pb dating of closed-system zircons, *Science*, 305, 1760–1763,  
1097 <https://doi.org/10.1126/science.1101012>, 2004.  
1098  
1099 Murakami, T., Chakoumakos, B. C., Ewing, R. C., Lumpkin, G. R., and Weber, W. J.: Alpha-  
1100 decay event damage in zircon, *Am. Mineral.*, 76, 1510–1532, 1991.  
1101  
1102 Nasdala, L., Irmer, G., and Wolf, D.: The degree of metamictization in zircon: a Raman  
1103 spectroscopic study, *Eur. J. Mineral.*, 7, 471–478, <https://doi.org/10.1127/ejm/7/3/0471>, 1995.  
1104  
1105 Nasdala, L., Pidgeon, R. T., Wolf, D., and Irmer, G.: Metamictization and U-Pb isotopic  
1106 discordance in single zircons: a combined Raman microprobe and SHRIMP ion probe study,  
1107 *Mineral. Petrol.*, 62, 1–27, <https://doi.org/10.1007/bf01173760>, 1998.  
1108  
1109 Nasdala, L., Wenzel, M., Vavra, G., Irmer, G., Wenzel, T., and Kober, B.: Metamictisation of  
1110 natural zircon: accumulation versus thermal annealing of radioactivity-induced damage, *Contrib.*  
1111 *Mineral. Petr.*, 141, 125–144, <https://doi.org/10.1007/s004100000235>, 2001.  
1112  
1113 Nasdala, L., Reiners, P. W., Garver, J. I., Kennedy, A. K., Stern, R. A., Balan, E., and Wirth, R.:  
1114 Incomplete retention of radiation damage in zircon from Sri Lanka, *Am. Mineral.*, 89, 219–231,  
1115 2004.  
1116  
1117 Nassau, K.: Heat treating ruby and sapphire: Technical aspects, *Gems Gemol.*, 17, 121–131,  
1118 <https://doi.org/10.5741/gems.17.3.121>, 1981.  
1119  
1120 Paces, J. B. and Miller, J. D.: Precise U-Pb ages of Duluth Complex and related mafic intrusions,  
1121 northeastern Minnesota: Geochronological insights to physical, petrogenetic, paleomagnetic, and  
1122 tectonomagmatic processes associated with the 1.1 Ga Midcontinent Rift System, *J. Geophys.*  
1123 *Res. Solid Earth*, 98, 13997–14013, <https://doi.org/10.1029/93jb01159>, 1993.  
1124



- 1125 Palenik, C. S., Nasdala, L., and Ewing, R. C.: Radiation damage in zircon, *Am. Mineral.*, 88,  
1126 770–781, <https://doi.org/10.2138/am-2003-5-606>, 2003.
- 1127
- 1128 Peterman, E. M., Reddy, S. M., Saxey, D. W., Snoeyenbos, D. R., Rickard, W. D. A.,  
1129 Fougereuse, D., and Kylander-Clark, A. R. C.: Nanogeochronology of discordant zircon  
1130 measured by atom probe microscopy of Pb-enriched dislocation loops, *Sci. Adv.*, 2, e1601318,  
1131 <https://doi.org/10.1126/sciadv.1601318>, 2016.
- 1132
- 1133 Peterman, E. M., Reddy, S. M., Saxey, D. W., Fougereuse, D., Snoeyenbos, D. R., and Rickard,  
1134 W. D. A.: Nanoscale processes of trace element mobility in metamorphosed zircon, *Contrib.*  
1135 *Mineral. Petr.*, 174, 92, <https://doi.org/10.1007/s00410-019-1631-1>, 2019.
- 1136
- 1137 Petit, J.-C., Dran, J.-C., Paccagnella, A., and Mea, G. D.: Structural dependence of crystalline  
1138 silicate hydration during aqueous dissolution, *Earth Planet. Sci. Lett.*, 93, 292–298,  
1139 [https://doi.org/10.1016/0012-821x\(89\)90077-0](https://doi.org/10.1016/0012-821x(89)90077-0), 1989.
- 1140
- 1141 Reddy, S. M., Riessen, A. van, Saxey, D. W., Johnson, T. E., Rickard, W. D. A., Fougereuse, D.,  
1142 Fischer, S., Prosa, T. J., Rice, K. P., Reinhard, D. A., Chen, Y., and Olson, D.: Mechanisms of  
1143 deformation-induced trace element migration in zircon resolved by atom probe and correlative  
1144 microscopy, *Geochim. Cosmochim. Acta*, 195, 158–170,  
1145 <https://doi.org/10.1016/j.gca.2016.09.019>, 2016.
- 1146
- 1147 Rizvanova, N. G., Levchenkov, O. A., Belous, A. E., Bezmen, N. I., Maslenikov, A. V.,  
1148 Komarov, A. N., Makeev, A. F., and Levskiy, L. K.: Zircon reaction and stability of the U-Pb  
1149 isotope system during interaction with carbonate fluid: experimental hydrothermal study,  
1150 *Contrib. Mineral. Petr.*, 139, 101–114, <https://doi.org/10.1007/s004100050576>, 2000.
- 1151
- 1152 Schmitz, M. D. and Davydov, V. I.: Quantitative radiometric and biostratigraphic calibration of  
1153 the Pennsylvanian–Early Permian (Cisuralian) time scale and pan-Euramerican  
1154 chronostratigraphic correlation, *GSA Bulletin*, 124, 549–577, <https://doi.org/10.1130/b30385.1>,  
1155 2012.
- 1156
- 1157 Schmitz, M. D., Bowring, S. A., and Ireland, T. R.: Evaluation of Duluth Complex anorthositic  
1158 series (AS3) zircon as a U-Pb geochronological standard: new high-precision isotope dilution  
1159 thermal ionization mass spectrometry results, *Geochim. Cosmochim. Acta*, 67, 3665–3672,  
1160 [https://doi.org/10.1016/s0016-7037\(03\)00200-x](https://doi.org/10.1016/s0016-7037(03)00200-x), 2003.
- 1161
- 1162 Schoene, B.: *Treatise on Geochemistry (Second Edition)*, in: *Treatise on Geochemistry*, vol. 4,  
1163 edited by: Holland, H. D. and Turekian, K. K., *Treatise on Geochemistry*, 341–378,  
1164 <https://doi.org/10.1016/b978-0-08-095975-7.00310-7>, 2014.
- 1165
- 1166 Schoene, B., Guex, J., Bartolini, A., Schaltegger, U., and Blackburn, T. J.: Correlating the end-  
1167 Triassic mass extinction and flood basalt volcanism at the 100 ka level, *Geology*, 38, 387–390,  
1168 <https://doi.org/10.1130/g30683.1>, 2010a.
- 1169

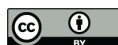

- 1170 Schoene, B., Latkoczy, C., Schaltegger, U., and Günther, D.: A new method integrating high-  
1171 precision U–Pb geochronology with zircon trace element analysis (U–Pb TIMS-TEA), *Geochim.*  
1172 *Cosmochim. Acta*, 74, 7144–7159, <https://doi.org/10.1016/j.gca.2010.09.016>, 2010b.  
1173  
1174  
1175 Subbarao, E. C., Agrawal, D. K., McKinstry, H. A., Sallese, C. W., and Roy, R.: Thermal  
1176 expansion of compounds of zircon structure, *J. Am. Ceram. Soc.*, 73, 1246–1252,  
1177 <https://doi.org/10.1111/j.1151-2916.1990.tb05187.x>, 1990.  
1178  
1179 Swanson-Hysell, N. L., Hoaglund, S. A., Crowley, J. L., Schmitz, M. D., Zhang, Y., and Miller,  
1180 J. D.: Rapid emplacement of massive Duluth Complex intrusions within the North American  
1181 Midcontinent Rift, *Geology*, 49, 185–189, <https://doi.org/10.1130/g47873.1>, 2020.  
1182  
1183 Takehara, M., Horie, K., Hokada, T., and Kiyokawa, S.: New insight into disturbance of U-Pb  
1184 and trace-element systems in hydrothermally altered zircon via SHRIMP analyses of zircon from  
1185 the Duluth Gabbro, *Chem. Geol.*, 484, 168–178, <https://doi.org/10.1016/j.chemgeo.2018.01.028>,  
1186 2018.  
1187  
1188 Trachenko, K., Dove, M. T., and Salje, E. K. H.: Structural changes in zircon under  $\alpha$ -decay  
1189 irradiation, *Phys. Rev. B*, 65, 180102, <https://doi.org/10.1103/physrevb.65.180102>, 2002.  
1190  
1191 Váczi, T.: A new, simple approximation for the deconvolution of instrumental broadening in  
1192 spectroscopic band profiles, *Appl. Spectrosc.*, 68, 1274–1278, <https://doi.org/10.1366/13-07275>,  
1193 2014.  
1194  
1195 Váczi, T. and Nasdala, L.: Electron-beam-induced annealing of natural zircon: a Raman  
1196 spectroscopic study, *Phys. Chem. Mineral.*, 44, 389–401, [https://doi.org/10.1007/s00269-016-](https://doi.org/10.1007/s00269-016-0866-x)  
1197 [0866-x](https://doi.org/10.1007/s00269-016-0866-x), 2017.  
1198  
1199 Weber, W. J.: Radiation-induced defects and amorphization in zircon, *J. Materials Res.*, 5, 2687–  
1200 2697, 1990.  
1201  
1202 Widmann, P., Davies, J. H. F. L., and Schaltegger, U.: Calibrating chemical abrasion: Its effects  
1203 on zircon crystal structure, chemical composition and U-Pb age, *Chem. Geol.*, 511, 1–10,  
1204 <https://doi.org/10.1016/j.chemgeo.2019.02.026>, 2019.  
1205  
1206 Yamada, R., Tagami, T., Nishimura, S., and Ito, H.: Annealing kinetics of fission tracks in  
1207 zircon: an experimental study, *Chem. Geol.*, 122, 249–258, [https://doi.org/10.1016/0009-](https://doi.org/10.1016/0009-2541(95)00006-8)  
1208 [2541\(95\)00006-8](https://doi.org/10.1016/0009-2541(95)00006-8), 1995.  
1209  
1210 Yamada, R., Murakami, M., and Tagami, T.: Statistical modelling of annealing kinetics of  
1211 fission tracks in zircon; Reassessment of laboratory experiments, *Chem. Geol.*, 236, 75–91,  
1212 <https://doi.org/10.1016/j.chemgeo.2006.09.002>, 2007.  
1213



- 1214 Zhang, M., Salje, E. K. H., Capitani, G. C., Leroux, H., Clark, A. M., Schlüter, J., and Ewing, R.  
1215 C.: Annealing of alpha-decay damage in zircon: a Raman spectroscopic study, *J. Phys. Condens.*  
1216 *Matter*, 12, 3131, <https://doi.org/10.1088/0953-8984/12/13/321>, 2000.
